# Supplementary material for: Seasonal genetic variation and genetic structure of Spodoptera exigua in Liaoning Province, Northeast China: insights from 11 years of microsatellite data
Source: PeerJ journal article supplement (doi:10.7717/peerj.19243), 2025-04-02
Supplement: Table_S2.xlsx [file Table_S2.xlsx]

## Sheet: Sheet1
Table S2 Raw reads of the amplified fragment length from 1095 individuals collected from 50 seasonal populations of Spodoptera exigua in northern China based on eight loci in this study
population	ID	spe06		spe11		spe08		spe09		spe15		spe07		spe10		spe12
		1A	1B	2A	2B	3A	3B	4A	4B	5A	5B	6A	6B	7A	7B	8A	8B
SY1208	1-01	210	213	199	199	204	204	147	147	232	232	184	184	214	214	205	205
SY1208	1-02	210	210	199	199	201	213	147	147	235	235	184	184	214	214	201	201
SY1208	1-03	210	210	199	199	210	213	165	165	220	247	180	184	214	214	201	209
SY1208	1-04	210	210	199	199	210	213	143	143	202	235	180	184	214	214	199	199
SY1208	1-05	210	207	196	196	210	213	147	151	241	244	184	184	214	214	201	201
SY1208	1-06	210	210	196	196	204	219	147	147	229	235	184	184	214	214	201	207
SY1208	1-07	210	210	199	199	192	219	165	165	232	238	184	184	214	214	201	201
SY1208	1-08	210	210	199	199	201	207	153	153	232	244	184	184	214	223	205	205
SY1208	1-09	210	207	199	199	201	207	153	153	232	244	184	184	214	214	205	205
SY1208	1-10	210	210	196	199	201	207	151	151	247	247	184	184	214	214	195	201
SY1208	1-11	210	207	193	193	204	204	149	149	232	238	184	184	214	214	199	199
SY1208	1-12	210	210	196	196	201	213	143	151	229	232	184	184	214	214	205	207
SY1208	1-13	210	210	199	199	204	204	151	165	223	229	184	184	214	214	199	207
SY1208	1-14	210	207	196	199	204	213	165	165	229	232	184	184	214	223	201	201
SY1208	1-15	210	210	199	202	222	221	151	151	238	238	180	184	214	214	201	209
SY1208	1-16	210	213	193	196	216	219	151	151	238	247	180	180	214	223	199	207
SY1208	1-17	210	210	196	199	204	219	147	161	229	238	184	184	214	223	199	205
SY1208	1-18	210	210	199	199	219	219	153	153	220	244	184	184	214	214	201	209
SY1208	1-19	210	210	196	199	216	216	151	151	229	238	180	180	214	214	207	207
SY1208	1-20	210	210	196	196	192	207	147	151	223	238	180	180	214	214	207	207
SY1208	1-21	210	210	196	199	201	201	153	165	229	238	180	188	214	214	199	201
SY1208	1-22	210	207	199	199	198	219	143	153	229	247	184	184	214	214	199	205
SY1208	1-23	210	210	199	199	204	204	155	155	220	238	184	184	214	223	203	203
SY1208	1-24	210	210	196	199	216	216	149	149	238	247	180	180	214	223	207	211
SY1208	1-25	210	210	199	199	210	219	147	165	232	235	184	184	214	220	201	209
SY1208	1-26	210	207	199	199	213	219	143	153	235	238	184	184	214	214	201	201
SY1208	1-27	210	210	193	199	210	221	149	149	235	238	180	184	214	214	201	211
SY1208	1-28	210	210	199	199	204	216	147	149	235	244	180	184	214	223	201	201
SY1208	1-29	210	210	199	199	201	204	151	165	223	241	180	184	214	223	201	205
SY1208	1-30	210	210	199	199	210	213	151	157	229	232	180	184	214	223	199	199
SY1306	2-01	210	213	193	196	213	213	151	165	229	232	184	184	214	214	199	209
SY1306	2-02	210	210	193	196	219	219	147	149	232	241	184	184	214	214	201	201
SY1306	2-03	210	213	196	196	210	210	153	153	235	235	184	184	214	217	199	199
SY1306	2-04	210	210	196	196	219	219	145	147	226	235	180	184	205	217	199	203
SY1306	2-05	210	213	199	205	216	219	145	151	232	238	184	184	214	223	0	0
SY1306	2-06	210	210	196	199	210	210	151	157	229	238	184	184	214	214	199	207
SY1306	2-07	210	210	196	196	210	219	145	151	229	238	184	184	214	214	209	209
SY1306	2-08	210	210	193	196	219	221	149	149	217	235	184	184	214	214	199	199
SY1306	2-09	210	213	193	196	201	219	145	147	232	235	184	184	214	214	201	201
SY1306	2-10	210	213	196	196	198	213	157	157	229	232	0	0	214	214	201	201
SY1306	2-11	210	213	190	196	210	219	123	151	226	232	184	184	214	214	199	199
SY1306	2-12	210	213	196	196	204	213	147	153	220	244	184	184	217	217	199	203
SY1306	2-13	210	213	196	199	213	219	149	157	232	247	184	184	214	214	199	199
SY1306	2-14	210	213	193	196	219	219	145	145	238	244	182	182	214	214	203	203
SY1306	2-15	210	210	190	196	201	204	149	149	232	235	180	184	217	217	199	199
SY1306	2-16	210	213	196	196	207	219	143	147	223	244	184	184	214	214	197	211
SY1306	2-17	210	210	196	196	207	219	145	155	232	244	184	184	214	214	201	201
SY1306	2-18	210	210	193	196	210	216	149	149	217	235	184	184	214	217	199	203
SY1306	2-19	210	210	190	196	210	210	149	165	232	238	184	184	214	214	201	211
SY1306	2-20	210	210	196	196	201	210	147	151	235	238	184	184	214	214	201	211
SY1306	2-21	210	210	193	196	210	210	157	165	232	235	184	184	214	214	209	211
SY1306	2-22	210	210	193	196	210	192	147	165	235	247	184	184	214	214	209	209
SY1306	2-23	210	210	193	196	219	219	151	151	229	232	184	184	220	220	195	205
SY1306	2-24	210	213	193	193	210	219	147	157	235	238	184	184	214	214	201	215
SY1308	3-01	210	210	196	199	210	210	151	157	232	235	184	184	214	214	199	199
SY1308	3-02	210	210	193	199	207	210	147	147	229	238	184	184	214	214	201	201
SY1308	3-03	210	213	199	199	207	219	155	159	235	235	184	184	214	214	199	207
SY1308	3-04	210	210	199	199	201	201	147	149	220	229	184	184	214	223	199	199
SY1308	3-05	0	0	199	202	201	210	149	149	235	235	184	184	214	214	201	201
SY1308	3-06	210	213	196	196	207	210	149	155	238	238	184	184	214	214	199	199
SY1308	3-07	210	213	196	196	0	0	149	157	0	0	184	184	220	220	199	209
SY1308	3-08	210	213	196	196	201	204	143	147	226	244	184	184	214	214	199	211
SY1308	3-09	210	213	196	199	210	213	149	157	229	229	184	184	214	214	199	199
SY1308	3-10	210	210	196	202	210	210	149	165	229	229	184	184	214	214	199	199
SY1308	3-11	210	213	199	199	201	219	149	149	220	238	184	184	214	214	199	199
SY1308	3-12	210	213	199	199	210	210	155	155	235	238	184	184	214	214	199	219
SY1308	3-13	210	213	196	196	201	219	147	151	232	232	184	184	217	217	201	213
SY1308	3-14	210	213	196	199	204	210	147	147	220	235	184	184	214	214	201	201
SY1308	3-15	210	213	193	196	210	219	149	151	226	232	184	184	214	214	201	205
SY1308	3-16	210	219	196	196	204	210	157	169	226	235	184	184	214	214	199	209
SY1308	3-17	210	210	193	199	201	204	149	153	235	241	184	184	214	214	209	209
SY1308	3-18	210	210	199	199	201	210	149	151	238	241	184	184	214	223	209	211
SY1308	3-19	0	0	190	199	207	219	149	149	244	244	184	184	214	223	209	211
SY1308	3-20	210	210	196	199	210	219	149	151	226	226	184	184	214	214	209	209
SY1308	3-21	210	213	196	199	207	210	147	147	220	232	184	184	214	214	209	215
SY1308	3-22	210	213	193	199	210	221	147	157	220	235	184	184	214	214	211	211
SY1308	3-23	210	213	199	199	201	216	145	149	232	235	184	184	214	214	211	211
SY1308	3-24	210	213	199	199	219	219	149	149	223	229	184	184	214	217	199	199
SY1309	4-01	207	213	190	196	216	216	147	147	244	244	184	184	214	214	199	209
SY1309	4-02	207	213	199	199	219	219	147	147	232	244	180	184	205	214	199	207
SY1309	4-03	204	213	190	196	207	219	145	155	232	244	184	184	214	214	199	199
SY1309	4-04	210	213	196	199	204	210	149	155	229	247	180	180	214	214	199	205
SY1309	4-05	204	213	190	193	219	219	133	147	235	244	180	184	214	214	201	215
SY1309	4-06	207	213	199	199	210	219	155	165	229	235	184	184	214	214	201	207
SY1309	4-07	204	213	196	199	207	219	143	153	223	244	184	184	214	214	199	199
SY1309	4-08	204	213	193	196	210	219	147	157	232	235	182	184	214	214	199	199
SY1309	4-09	204	213	196	199	204	219	149	149	232	235	184	184	214	214	199	199
SY1309	4-10	204	210	199	199	204	207	149	149	220	232	184	184	214	214	199	199
SY1309	4-11	204	210	199	199	198	210	149	165	229	247	184	184	214	214	203	209
SY1309	4-12	207	210	199	199	210	210	149	149	235	238	184	184	214	214	201	217
SY1309	4-13	204	210	199	199	201	210	143	165	220	223	184	184	214	214	209	209
SY1309	4-14	204	210	199	202	201	201	143	165	229	235	180	184	214	214	205	209
SY1309	4-15	204	210	196	199	210	210	149	157	232	247	180	184	214	214	199	205
SY1309	4-16	210	210	193	199	207	210	149	151	235	238	184	184	217	217	199	209
SY1309	4-17	204	210	193	199	216	210	143	149	232	241	184	184	214	214	201	201
SY1309	4-18	204	210	196	199	219	210	143	169	229	235	184	184	214	214	199	199
SY1309	4-19	204	213	196	199	219	224	147	151	235	241	182	184	214	214	199	199
SY1309	4-20	204	213	190	199	201	219	147	149	232	235	184	184	214	214	199	207
SY1309	4-21	207	213	199	199	207	219	143	149	235	241	184	184	214	214	201	207
SY1309	4-22	204	210	196	199	219	219	147	165	220	244	180	180	214	214	199	199
SY1309	4-23	204	210	199	199	210	221	151	155	223	232	184	184	214	223	201	209
SY1309	4-24	207	210	196	196	219	219	149	153	235	235	184	184	214	214	199	209
SY1310	5-01	207	210	193	196	219	219	147	147	232	238	184	184	214	214	199	209
SY1310	5-02	204	213	193	196	219	219	147	147	214	232	184	184	214	214	205	205
SY1310	5-03	204	210	193	196	201	219	145	149	214	232	184	184	214	220	205	205
SY1310	5-04	204	213	196	196	201	219	149	165	235	244	184	184	214	214	211	211
SY1310	5-05	204	213	196	196	204	216	145	145	226	229	184	184	217	217	199	205
SY1310	5-06	204	213	199	199	204	216	145	145	226	229	184	184	217	217	199	209
SY1310	5-07	210	213	199	199	204	219	145	147	229	241	184	184	214	214	201	201
SY1310	5-08	210	213	199	199	210	210	149	151	238	247	180	184	214	214	205	209
SY1310	5-09	210	210	199	199	219	219	149	153	220	229	184	184	214	214	199	199
SY1310	5-10	219	213	199	199	216	219	147	149	238	247	184	184	214	214	201	201
SY1310	5-11	210	213	199	199	201	207	149	149	217	247	184	184	214	214	199	201
SY1310	5-12	210	213	199	202	207	219	149	155	232	244	184	184	214	214	199	203
SY1310	5-13	210	213	196	199	201	210	149	157	235	241	180	184	214	214	201	209
SY1310	5-14	210	213	190	199	201	210	149	157	229	241	184	184	214	214	205	215
SY1310	5-15	210	210	190	199	216	219	149	157	232	244	0	0	214	217	201	205
SY1310	5-16	210	213	196	199	201	219	143	149	229	244	184	184	214	223	199	213
SY1310	5-17	210	213	196	199	201	219	149	157	235	238	0	0	214	214	199	199
SY1310	5-18	210	213	196	199	201	219	149	149	229	235	184	184	214	223	199	209
SY1310	5-19	210	213	199	205	201	219	149	149	241	241	184	184	214	214	205	209
SY1310	5-20	210	222	196	199	210	210	149	149	229	229	184	184	214	214	199	209
SY1310	5-21	210	213	196	199	213	213	149	153	232	238	184	184	214	223	199	209
SY1310	5-22	210	213	196	199	204	219	149	151	226	226	180	184	217	217	199	205
SY1310	5-23	210	213	193	196	201	210	133	149	226	235	180	184	214	214	199	201
SY1310	5-24	210	210	196	202	201	210	149	155	244	244	184	184	217	217	199	199
SY1406	6-01	210	213	199	199	210	213	147	157	235	235	184	184	214	214	0	0
SY1406	6-02	210	210	199	199	204	213	147	147	232	232	184	184	214	214	199	199
SY1406	6-03	210	213	199	202	210	219	145	147	220	235	184	184	214	232	201	201
SY1406	6-04	210	210	199	199	207	219	145	147	229	238	0	0	214	214	201	201
SY1406	6-05	210	210	199	199	210	219	145	155	235	244	184	184	214	214	199	199
SY1406	6-06	210	210	199	199	201	219	151	165	232	238	184	184	214	220	201	201
SY1406	6-07	210	210	199	199	207	219	147	147	235	238	184	184	214	214	199	199
SY1406	6-08	210	210	199	199	201	219	149	165	229	229	184	184	214	214	201	201
SY1406	6-09	210	210	193	193	210	210	149	165	226	244	184	184	214	214	199	199
SY1406	6-10	210	210	199	199	201	201	145	161	226	235	180	180	214	220	205	213
SY1406	6-11	0	0	199	199	201	221	145	147	238	244	184	184	214	214	199	199
SY1406	6-12	210	213	193	193	210	210	145	147	229	232	184	184	214	214	199	199
SY1406	6-13	210	213	199	199	210	219	145	145	235	244	184	184	214	214	201	201
SY1406	6-14	210	213	199	199	219	219	149	149	229	232	184	184	220	223	0	0
SY1406	6-15	210	213	199	199	201	219	151	151	232	235	184	184	214	226	201	201
SY1406	6-16	210	213	199	199	201	219	143	149	232	235	184	184	214	226	0	0
SY1406	6-17	210	213	199	199	201	219	143	149	232	235	184	184	214	226	201	201
SY1406	6-18	210	213	199	199	201	219	143	149	232	235	184	184	214	226	0	0
SY1406	6-19	210	213	193	199	192	192	145	147	232	232	184	184	214	214	199	199
SY1406	6-20	210	213	193	199	210	210	147	149	232	235	184	184	214	214	199	199
SY1406	6-21	210	213	199	199	204	204	149	149	223	232	180	180	217	217	199	207
SY1406	6-22	210	213	199	199	213	213	145	149	232	235	184	184	214	214	199	199
SY1406	6-23	0	0	193	199	0	0	145	151	232	235	184	184	214	214	199	199
SY1406	6-24	210	213	199	199	210	213	147	169	235	235	184	184	214	214	199	199
SY1408	7-01	0	0	199	199	210	219	143	149	229	235	184	184	214	214	201	205
SY1408	7-02	210	210	196	199	210	219	143	149	229	235	0	0	214	214	199	199
SY1408	7-03	210	210	196	199	210	219	145	147	229	235	184	184	214	214	199	199
SY1408	7-04	210	210	196	199	210	219	149	149	229	235	184	184	214	214	199	199
SY1408	7-05	210	210	196	199	210	219	149	157	229	235	184	184	214	214	201	201
SY1408	7-06	210	210	196	199	210	219	149	157	229	235	184	184	214	214	199	199
SY1408	7-07	210	210	196	199	210	219	143	149	229	235	184	184	214	214	199	205
SY1408	7-08	210	210	196	199	210	219	147	149	229	235	184	184	214	214	199	205
SY1408	7-09	210	210	196	199	210	219	143	149	229	235	184	184	214	214	199	205
SY1408	7-10	210	210	196	199	210	219	143	149	229	235	184	184	214	214	199	199
SY1408	7-11	210	210	0	0	210	219	143	149	229	235	184	184	214	214	199	205
SY1408	7-12	210	210	199	199	210	219	143	149	229	235	184	184	214	214	199	205
SY1408	7-13	210	210	196	196	210	219	143	149	229	235	184	184	214	214	199	199
SY1408	7-14	210	210	193	193	210	219	143	149	229	235	184	184	214	214	199	205
SY1408	7-15	210	210	193	193	210	219	143	149	229	235	184	184	214	214	199	205
SY1408	7-16	210	210	193	193	210	219	143	149	229	235	184	184	214	214	199	205
SY1408	7-17	210	210	196	199	210	219	143	149	229	235	184	184	214	214	199	205
SY1408	7-18	210	210	196	199	210	219	149	151	229	235	184	184	214	214	201	201
SY1408	7-19	210	210	199	199	210	219	143	149	229	235	184	184	214	214	199	199
SY1408	7-20	210	210	199	199	210	219	143	149	229	235	184	184	214	214	199	199
SY1408	7-21	210	210	199	199	210	219	143	149	229	235	184	184	214	214	199	199
SY1408	7-22	210	210	199	199	210	219	143	149	229	235	184	184	214	217	199	199
SY1408	7-23	210	210	196	196	210	219	143	149	229	235	184	184	214	217	199	199
SY1408	7-24	210	210	196	196	210	219	143	149	229	235	184	184	214	214	199	199
SY1409	8-01	210	210	199	199	213	219	157	157	226	235	184	184	217	217	199	199
SY1409	8-02	213	210	199	199	201	201	147	147	235	244	184	184	217	223	209	209
SY1409	8-03	210	210	199	199	198	204	149	149	220	229	0	0	223	223	199	207
SY1409	8-04	210	213	199	199	198	198	147	149	238	238	0	0	217	217	201	201
SY1409	8-05	210	213	193	196	207	219	155	159	235	238	184	184	214	214	199	199
SY1409	8-06	210	210	199	199	198	219	145	149	235	235	184	184	214	214	203	209
SY1409	8-07	210	213	196	199	219	219	149	151	232	232	184	184	217	223	201	213
SY1409	8-08	210	210	193	199	219	219	149	157	235	235	184	184	214	214	205	205
SY1409	8-09	210	210	196	199	192	216	149	149	229	232	184	184	214	214	199	201
SY1409	8-10	210	210	196	199	210	219	149	155	235	238	180	180	223	223	199	199
SY1409	8-11	210	213	199	199	192	219	153	153	232	235	180	180	214	214	199	209
SY1409	8-12	210	213	199	202	213	213	149	149	235	241	184	184	214	214	199	203
SY1409	8-13	210	210	199	199	216	219	147	147	223	238	184	184	223	223	199	209
SY1409	8-14	210	213	199	199	213	210	149	149	232	238	180	184	214	214	199	209
SY1409	8-15	210	213	193	199	204	213	143	147	235	238	184	184	214	214	199	199
SY1409	8-16	210	210	199	199	216	219	147	169	238	244	184	184	223	223	199	201
SY1409	8-17	210	213	199	199	201	219	155	155	235	238	184	184	214	214	199	201
SY1409	8-18	210	210	196	196	183	219	143	147	232	238	180	180	214	214	199	209
SY1409	8-19	210	210	196	196	210	210	147	149	229	241	182	184	214	214	201	201
SY1409	8-20	210	210	199	202	201	221	147	147	217	238	184	184	214	214	201	201
SY1409	8-21	210	210	199	199	192	198	149	149	229	238	184	184	214	214	201	215
SY1409	8-22	210	210	199	199	222	221	147	149	235	235	180	180	214	214	199	211
SY1409	8-23	210	210	196	196	183	201	149	149	232	226	184	184	214	214	199	205
SY1409	8-24	210	210	199	199	210	210	149	155	232	244	184	184	214	214	201	205
SY1410	9-01	210	210	199	199	210	216	143	143	235	244	180	184	214	214	199	211
SY1410	9-02	210	210	196	199	183	213	149	155	235	238	184	184	214	214	201	203
SY1410	9-03	210	210	199	199	204	213	159	159	232	232	184	184	214	220	199	199
SY1410	9-04	210	210	199	202	201	219	149	149	235	238	184	184	214	214	199	209
SY1410	9-05	0	0	199	199	210	219	125	149	223	235	184	184	214	214	199	201
SY1410	9-06	210	210	199	199	192	192	143	149	217	223	184	184	214	214	201	201
SY1410	9-07	210	210	199	199	198	198	127	151	235	235	184	184	214	223	199	207
SY1410	9-08	210	213	193	196	210	219	133	149	235	235	180	184	214	223	201	207
SY1410	9-09	210	210	199	199	210	210	147	149	235	238	180	184	214	223	199	217
SY1410	9-10	210	210	190	193	213	219	147	149	235	238	184	184	220	223	199	199
SY1410	9-11	210	210	196	199	204	216	149	149	229	244	184	184	214	214	199	209
SY1410	9-12	210	210	199	199	210	213	157	157	220	232	184	184	217	220	199	213
SY1410	9-13	210	210	193	193	198	198	145	157	232	235	184	184	214	214	199	199
SY1410	9-14	210	210	199	199	213	213	149	149	226	229	184	184	214	214	205	205
SY1410	9-15	210	210	199	199	192	201	127	149	244	247	184	184	214	214	199	209
SY1410	9-16	210	210	193	202	210	219	147	155	232	238	180	180	214	214	199	199
SY1410	9-17	210	210	199	199	210	210	147	151	238	244	184	184	214	214	199	199
SY1410	9-18	210	210	196	199	210	210	147	149	235	238	184	184	214	214	199	199
SY1410	9-19	210	213	199	199	210	219	147	155	229	238	184	184	214	214	199	199
SY1410	9-20	210	210	199	202	204	204	151	157	235	235	180	180	214	220	203	203
SY1410	9-21	210	210	199	199	216	219	153	153	229	232	184	184	214	214	201	201
SY1410	9-22	210	210	199	199	210	219	149	149	220	229	184	184	214	214	199	211
SY1410	9-23	210	210	193	199	192	213	147	147	229	241	184	184	214	214	205	215
SY1410	9-24	210	210	196	199	210	210	147	159	232	235	180	180	217	217	201	207
SY1506	10-01	210	210	199	199	204	210	147	165	223	235	184	184	214	214	199	211
SY1506	10-02	210	210	199	199	216	219	147	169	232	235	184	184	214	214	199	199
SY1506	10-03	210	210	193	199	201	219	145	145	226	235	184	184	217	217	201	209
SY1506	10-04	210	210	193	199	219	219	147	157	229	232	180	180	214	223	199	199
SY1506	10-05	210	210	193	193	213	219	143	143	238	241	184	184	214	223	207	209
SY1506	10-06	210	213	199	199	207	219	155	165	208	235	184	184	214	223	199	199
SY1506	10-07	210	213	199	199	210	210	149	149	235	244	0	0	214	214	199	209
SY1506	10-08	210	213	199	199	207	219	149	149	232	238	184	184	214	223	199	199
SY1506	10-09	210	213	199	199	204	210	151	165	226	235	184	184	214	223	201	201
SY1506	10-10	210	213	193	193	207	219	151	151	232	232	184	184	214	214	199	199
SY1506	10-11	210	213	199	199	213	213	147	161	235	238	184	184	214	223	207	207
SY1506	10-12	210	210	193	199	210	210	143	143	235	244	184	184	214	214	199	209
SY1506	10-13	210	210	193	193	198	219	147	147	232	238	184	184	214	214	209	209
SY1506	10-14	210	210	199	199	201	219	147	147	229	232	184	184	214	214	199	199
SY1506	10-15	210	213	199	199	216	219	145	145	235	238	184	184	214	214	209	209
SY1506	10-16	210	213	199	199	201	219	149	169	229	235	184	184	214	223	199	199
SY1506	10-17	210	213	193	193	201	219	147	147	232	235	184	184	214	214	199	199
SY1506	10-18	210	213	196	199	201	219	147	147	232	235	182	184	214	223	209	209
SY1506	10-19	210	213	0	0	201	219	143	161	226	235	184	184	214	223	201	211
SY1506	10-20	210	213	199	202	201	201	151	161	232	232	184	184	214	214	199	203
SY1506	10-21	210	210	193	199	210	213	149	149	229	238	184	184	214	214	199	203
SY1506	10-22	210	213	199	199	210	213	147	147	232	235	184	184	214	214	201	201
SY1506	10-23	210	213	193	193	210	213	145	145	226	226	180	180	214	220	199	203
SY1506	10-24	210	213	199	199	207	207	169	169	232	238	184	184	214	214	199	205
SY1507	11-01	210	213	196	196	222	221	147	149	232	244	184	184	214	214	199	209
SY1507	11-02	210	213	196	196	222	221	143	157	235	247	184	184	214	214	199	209
SY1507	11-03	210	210	199	199	192	216	149	157	232	244	184	184	214	214	199	199
SY1507	11-04	210	210	199	199	204	210	149	149	247	247	184	184	214	214	201	209
SY1507	11-05	210	213	193	196	219	219	147	149	235	238	184	184	214	214	201	203
SY1507	11-06	210	213	199	199	201	207	143	147	226	238	184	184	214	214	207	207
SY1507	11-07	210	213	193	196	204	216	143	149	226	226	180	184	214	214	201	209
SY1507	11-08	210	210	199	199	204	219	147	149	241	247	184	184	214	214	197	209
SY1507	11-09	210	213	196	196	201	216	147	149	235	238	184	184	214	214	199	199
SY1507	11-10	210	213	196	196	201	216	147	149	226	235	184	184	214	214	199	199
SY1507	11-11	210	213	196	199	216	216	151	151	238	238	184	184	217	217	199	199
SY1507	11-12	210	213	196	199	210	210	149	149	229	229	184	184	214	214	199	203
SY1507	11-13	210	210	196	199	201	207	151	165	226	235	184	184	214	223	199	205
SY1507	11-14	213	210	199	199	198	210	151	155	235	244	184	184	214	214	199	207
SY1507	11-15	210	213	193	199	207	207	153	153	226	232	184	184	214	214	201	201
SY1507	11-16	210	213	199	199	207	219	151	151	235	235	184	184	214	214	199	199
SY1507	11-17	210	213	193	199	210	213	147	169	229	232	184	184	214	223	199	209
SY1507	11-18	210	213	193	199	198	204	151	151	229	244	184	184	214	214	201	209
SY1507	11-19	210	210	199	199	210	219	151	165	232	238	184	184	214	223	199	201
SY1507	11-20	210	213	199	199	207	219	149	169	235	238	184	184	214	214	199	205
SY1507	11-21	210	213	196	199	210	219	147	157	232	241	184	184	214	214	199	199
SY1507	11-22	210	213	193	199	207	207	153	153	232	232	184	184	214	214	201	209
SY1507	11-23	210	213	193	196	213	219	151	165	235	241	184	184	214	223	199	207
SY1507	11-24	210	213	199	199	201	213	143	143	226	229	184	184	214	214	199	199
SY1508	12-01	213	210	196	199	192	201	145	145	232	244	180	182	0	0	199	199
SY1508	12-02	210	210	196	199	216	219	145	147	0	0	184	184	214	214	201	201
SY1508	12-03	210	210	196	196	201	219	143	147	220	229	180	184	214	214	201	201
SY1508	12-04	210	210	196	199	210	219	151	151	220	229	180	184	220	220	201	201
SY1508	12-05	210	210	196	199	213	219	147	147	232	238	184	184	214	214	205	205
SY1508	12-06	210	210	196	199	210	210	145	147	232	235	184	184	214	217	199	207
SY1508	12-07	210	213	196	199	210	219	143	143	232	235	184	184	214	223	201	201
SY1508	12-08	210	213	196	199	219	221	147	147	235	235	184	184	214	214	209	209
SY1508	12-09	210	210	196	199	201	207	145	149	238	238	182	184	214	214	199	199
SY1508	12-10	210	213	196	199	201	207	145	147	235	241	184	184	214	220	201	209
SY1508	12-11	210	210	196	199	201	216	145	151	238	238	180	184	214	214	201	201
SY1508	12-12	210	213	196	199	201	210	147	147	232	235	184	184	214	223	201	209
SY1508	12-13	210	213	196	199	207	213	143	145	241	241	184	184	214	217	201	201
SY1508	12-14	210	213	196	199	201	219	143	149	235	244	184	184	214	214	199	205
SY1508	12-15	210	213	196	199	219	221	143	145	235	244	184	184	214	214	203	203
SY1508	12-16	210	213	196	199	192	219	143	145	235	244	184	184	214	220	201	205
SY1508	12-17	210	210	196	196	204	219	147	153	229	232	184	184	214	214	201	201
SY1508	12-18	210	213	196	199	201	207	147	147	232	238	184	184	214	220	201	209
SY1508	12-19	210	213	196	199	207	219	143	155	229	244	184	184	214	214	201	209
SY1508	12-20	210	213	196	199	192	219	147	147	229	244	184	184	0	0	199	199
SY1508	12-21	210	210	196	196	210	221	147	147	0	0	180	184	220	220	199	199
SY1508	12-22	210	213	196	199	207	219	147	155	241	244	184	184	214	214	205	205
SY1508	12-23	210	210	196	196	201	219	145	149	0	0	184	184	214	214	199	209
SY1508	12-24	210	210	196	196	201	219	145	149	244	244	184	184	217	217	199	199
SY1509	13-01	210	213	199	199	201	219	143	153	235	241	184	184	214	214	207	207
SY1509	13-02	210	213	199	199	204	210	143	149	235	235	184	184	214	214	207	207
SY1509	13-03	210	213	199	199	210	210	165	165	235	235	184	184	214	214	199	199
SY1509	13-04	210	210	199	199	210	210	165	165	223	232	184	184	214	214	205	209
SY1509	13-05	210	210	199	199	210	219	147	151	229	235	184	184	214	214	199	211
SY1509	13-06	210	213	0	0	201	204	147	147	235	235	184	184	214	220	201	201
SY1509	13-07	210	210	0	0	201	219	147	149	232	235	182	184	214	217	197	205
SY1509	13-08	210	210	193	199	198	198	145	149	232	235	182	184	214	223	197	205
SY1509	13-09	210	213	193	199	210	210	147	147	232	238	184	184	211	214	197	297
SY1509	13-10	210	213	193	199	201	210	143	147	232	232	184	184	214	214	199	207
SY1509	13-11	210	210	199	199	201	210	143	157	232	244	184	184	214	214	199	207
SY1509	13-12	210	210	193	199	204	210	143	147	235	235	184	184	214	217	195	199
SY1509	13-13	210	210	199	199	201	219	147	159	232	235	182	184	214	217	201	207
SY1509	13-14	210	213	193	199	201	219	151	169	232	235	184	184	214	214	199	207
SY1509	13-15	210	219	199	199	201	210	143	153	232	238	180	180	214	226	201	201
SY1509	13-16	210	219	193	199	198	219	143	143	232	235	180	180	214	217	199	199
SY1509	13-17	210	213	193	199	219	219	147	147	232	235	184	184	214	214	201	201
SY1509	13-18	210	213	193	199	204	210	149	149	235	235	182	184	214	214	199	199
SY1509	13-19	210	213	193	199	204	210	149	153	235	235	182	184	214	220	199	199
SY1509	13-20	210	213	199	199	210	219	147	147	238	241	182	184	214	223	205	209
SY1509	13-21	210	210	199	199	213	219	147	153	229	235	184	184	214	217	203	209
SY1509	13-22	210	213	196	199	219	219	147	153	235	238	184	184	214	214	201	209
SY1509	13-23	210	210	193	193	222	204	143	149	220	238	184	184	0	0	209	209
SY1509	13-24	210	210	193	193	0	0	143	161	235	235	184	184	214	220	201	201
SY1510	14-01	210	210	193	193	201	219	151	153	235	238	184	184	214	223	199	207
SY1510	14-02	210	213	199	199	210	210	143	147	238	238	184	184	214	223	209	209
SY1510	14-03	210	213	193	193	207	216	163	163	232	235	180	184	214	223	201	209
SY1510	14-04	210	210	193	199	210	219	149	149	229	232	184	184	217	217	199	207
SY1510	14-05	210	213	193	199	201	201	145	151	226	232	184	184	214	217	201	209
SY1510	14-06	210	210	199	202	210	219	145	155	226	235	184	184	214	217	197	213
SY1510	14-07	210	213	193	202	213	219	149	155	238	244	184	184	220	220	201	201
SY1510	14-08	210	213	193	196	207	219	151	153	232	238	184	184	214	214	0	0
SY1510	14-09	210	213	199	199	210	210	147	147	232	235	184	184	214	214	199	211
SY1510	14-10	210	213	199	199	201	201	149	149	232	244	184	184	214	214	199	207
SY1510	14-11	210	213	196	196	222	219	147	147	229	232	184	184	214	214	209	213
SY1510	14-12	210	213	196	196	210	219	149	149	232	238	184	184	214	214	209	209
SY1510	14-13	210	213	193	199	204	213	153	153	241	247	184	184	214	214	199	209
SY1510	14-14	210	213	199	199	201	201	147	147	220	238	184	184	214	214	209	209
SY1510	14-15	210	213	193	193	204	204	149	149	220	232	184	184	217	217	199	199
SY1510	14-16	210	213	196	199	201	210	147	147	232	235	184	184	220	220	199	207
SY1510	14-17	210	213	199	205	201	210	145	145	226	238	184	184	214	214	201	201
SY1510	14-18	210	213	196	199	219	219	151	151	232	232	184	184	214	214	201	209
SY1510	14-19	210	213	199	199	204	219	151	151	232	241	0	0	214	223	209	209
SY1510	14-20	0	0	199	199	204	219	145	145	229	235	184	184	214	214	0	0
SY1510	14-21	210	210	193	199	201	210	155	155	232	244	184	184	214	214	201	209
SY1510	14-22	210	210	199	199	192	204	153	153	235	244	184	184	214	214	195	199
SY1510	14-23	210	213	193	196	207	210	147	147	226	229	184	184	214	214	201	201
SY1510	14-24	210	213	199	199	207	213	143	145	232	235	184	184	214	214	203	209
SY1606	15-01	210	210	193	196	201	213	143	151	232	238	184	184	214	214	199	199
SY1606	15-02	213	210	193	199	0	0	155	155	229	244	184	184	214	214	199	199
SY1606	15-03	210	210	199	199	210	213	145	145	232	235	184	184	214	217	201	201
SY1606	15-04	210	210	199	202	213	213	161	161	235	238	184	184	214	214	199	199
SY1606	15-05	210	210	199	202	198	210	147	147	232	235	184	184	214	214	199	205
SY1606	15-06	210	213	193	193	201	213	143	147	235	238	184	184	214	214	199	199
SY1606	15-07	213	210	199	199	219	219	153	155	229	238	184	184	214	214	199	209
SY1606	15-08	213	213	193	199	192	219	147	167	229	232	184	184	223	223	201	201
SY1606	15-09	213	210	193	199	216	219	147	147	229	232	184	184	214	214	205	211
SY1606	15-10	210	210	193	199	213	213	133	165	235	238	184	184	217	220	211	213
SY1606	15-11	210	213	199	199	213	216	145	161	238	247	184	184	214	214	199	199
SY1606	15-12	210	210	193	199	219	219	147	147	235	244	180	180	214	217	201	207
SY1606	15-13	210	210	193	205	219	221	147	147	229	244	180	184	214	214	201	201
SY1606	15-14	210	213	199	199	192	210	155	159	232	232	184	184	214	214	199	207
SY1606	15-15	210	213	193	196	201	207	147	147	232	238	184	184	220	223	205	209
SY1606	15-16	210	213	193	202	204	210	153	155	235	238	180	180	214	214	195	299
SY1606	15-17	210	210	199	199	207	219	143	145	229	235	184	184	214	223	199	211
SY1606	15-18	210	210	193	196	198	213	147	149	229	235	180	180	214	214	199	199
SY1606	15-19	210	213	193	199	219	221	159	169	229	229	0	0	214	214	201	201
SY1606	15-20	210	213	199	199	201	201	147	165	235	238	184	184	214	214	199	199
SY1606	15-21	210	210	199	199	210	210	143	147	232	238	180	180	214	214	201	209
SY1606	15-22	210	213	193	199	201	219	145	149	232	235	0	0	214	223	205	209
SY1606	15-23	210	210	193	193	210	219	147	147	235	235	184	184	214	214	199	209
SY1606	15-24	210	210	199	199	216	216	145	153	217	232	184	184	214	214	199	205
SY1607	16-01	210	210	199	199	210	219	143	147	226	238	184	184	214	220	199	209
SY1607	16-02	210	213	196	199	201	204	143	151	229	235	184	184	214	214	199	199
SY1607	16-03	210	210	196	196	213	219	145	153	0	0	184	184	214	214	201	201
SY1607	16-04	210	213	196	199	213	213	145	151	223	235	180	180	214	214	201	209
SY1607	16-05	210	210	196	199	201	210	147	149	223	235	184	184	214	214	199	199
SY1607	16-06	210	213	199	199	198	198	147	159	232	244	184	184	214	214	205	207
SY1607	16-07	210	213	199	199	207	219	131	161	235	235	182	184	214	220	199	199
SY1607	16-08	210	213	196	199	192	219	147	151	235	235	182	184	214	220	199	199
SY1607	16-09	210	210	199	199	210	216	143	153	235	235	180	180	214	229	199	209
SY1607	16-10	210	210	199	199	204	219	149	155	232	235	180	184	214	214	199	209
SY1607	16-11	210	210	199	199	207	207	143	153	235	235	184	184	220	220	199	199
SY1607	16-12	210	213	196	199	210	210	147	147	229	235	184	184	214	217	201	209
SY1607	16-13	213	210	196	199	210	219	145	145	229	235	184	184	0	0	201	205
SY1607	16-14	210	210	193	199	210	216	147	145	229	232	184	184	214	214	199	199
SY1607	16-15	210	210	193	202	219	221	147	149	235	247	184	184	214	214	199	209
SY1607	16-16	210	210	199	199	207	210	131	157	235	235	180	180	214	220	199	199
SY1607	16-17	210	210	199	199	207	221	145	145	235	235	184	184	214	223	201	201
SY1607	16-18	210	210	199	199	201	219	147	147	223	244	184	184	214	214	201	209
SY1607	16-19	210	210	196	199	216	219	147	147	226	235	184	184	214	214	199	199
SY1607	16-20	210	210	196	196	192	219	147	159	232	235	184	184	214	217	109	209
SY1607	16-21	210	210	196	199	201	219	147	147	223	229	184	184	0	0	201	201
SY1607	16-22	210	210	196	199	207	221	145	147	229	232	184	184	214	214	199	199
SY1607	16-23	210	210	196	199	210	219	131	161	226	235	180	184	214	220	199	199
SY1607	16-24	210	213	196	196	207	210	151	151	226	229	184	184	214	214	199	199
SY1608	17-01	210	213	199	199	210	210	143	145	235	247	184	184	214	220	199	199
SY1608	17-02	0	0	193	199	210	210	143	147	235	244	184	184	214	223	199	199
SY1608	17-03	210	210	193	199	204	219	145	157	238	244	184	184	214	214	199	217
SY1608	17-04	210	210	196	199	201	213	143	143	235	238	184	184	214	214	209	209
SY1608	17-05	210	210	196	199	201	207	145	145	223	229	184	184	214	214	199	205
SY1608	17-06	210	213	196	196	201	207	145	147	0	0	184	184	214	214	199	199
SY1608	17-07	210	213	193	199	204	213	155	155	232	235	184	184	214	214	199	199
SY1608	17-08	210	210	196	196	210	213	145	151	232	241	184	184	214	214	199	205
SY1608	17-09	210	213	196	199	213	219	149	149	232	241	180	180	214	214	205	205
SY1608	17-10	210	213	199	199	213	224	147	147	238	253	184	184	214	214	201	201
SY1608	17-11	210	210	199	199	210	213	147	153	229	241	182	182	217	217	199	199
SY1608	17-12	210	207	196	199	207	221	159	161	232	244	184	184	214	229	199	209
SY1608	17-13	207	210	196	199	210	219	0	0	235	247	182	184	214	214	199	199
SY1608	17-14	210	210	199	202	219	216	135	145	229	232	184	184	214	226	197	211
SY1608	17-15	0	0	199	202	204	219	143	145	229	241	184	184	214	214	199	203
SY1608	17-16	210	210	193	196	204	210	145	149	229	241	182	186	214	214	199	199
SY1608	17-17	210	213	193	196	213	204	147	147	229	241	182	184	214	214	199	199
SY1608	17-18	210	213	199	199	213	219	147	147	232	244	184	184	214	220	199	199
SY1608	17-19	210	213	196	199	210	216	145	147	229	235	180	184	214	214	199	201
SY1608	17-20	210	210	196	199	213	213	147	147	229	235	184	184	214	214	195	199
SY1608	17-21	210	210	193	199	219	216	133	145	232	235	184	184	214	214	197	209
SY1608	17-22	210	210	196	199	216	221	151	151	232	235	184	184	214	214	199	205
SY1608	17-23	210	213	193	199	201	216	145	153	235	241	184	184	214	214	199	199
SY1608	17-24	210	213	193	199	219	210	149	149	217	229	184	184	214	214	203	207
SY1609	18-01	210	213	199	199	222	219	147	149	235	241	184	184	229	229	199	199
SY1609	18-02	210	210	193	199	213	221	147	157	235	241	0	0	214	214	199	209
SY1609	18-03	210	213	199	199	207	219	145	149	223	238	184	184	214	214	199	211
SY1609	18-04	210	210	193	199	192	219	143	147	241	244	184	184	214	223	203	207
SY1609	18-05	207	210	199	199	213	192	147	147	229	241	184	184	214	214	201	201
SY1609	18-06	210	210	196	199	204	219	123	123	238	244	184	184	223	223	201	205
SY1609	18-07	210	210	199	199	198	219	145	145	235	241	184	184	214	214	199	201
SY1609	18-08	210	210	196	199	201	210	157	157	235	244	184	184	214	214	199	209
SY1609	18-09	210	210	199	199	210	219	151	157	235	241	184	184	214	214	209	209
SY1609	18-10	210	210	199	196	198	210	149	149	226	229	184	184	217	217	201	201
SY1609	18-11	210	213	193	199	204	219	145	145	232	235	184	184	214	217	197	209
SY1609	18-12	210	210	193	196	210	210	133	147	244	247	184	184	214	214	199	199
SY1609	18-13	0	0	196	196	219	219	147	147	238	244	180	184	217	217	201	209
SY1609	18-14	210	213	199	199	207	221	145	147	223	238	184	184	214	214	201	205
SY1609	18-15	210	210	199	199	201	210	149	149	241	244	184	184	214	235	201	209
SY1609	18-16	210	210	193	199	204	219	145	145	217	244	184	184	214	214	199	209
SY1609	18-17	210	213	199	199	210	210	145	155	226	226	184	184	214	214	201	201
SY1609	18-18	210	213	199	199	201	210	147	153	229	235	184	184	214	223	209	209
SY1609	18-19	207	210	199	199	198	210	147	149	235	244	184	184	214	214	201	201
SY1609	18-20	210	213	199	199	192	216	149	159	235	244	184	184	214	223	199	205
SY1609	18-21	0	0	193	199	201	210	147	147	232	232	184	184	214	214	197	201
SY1609	18-22	210	213	199	199	192	198	149	149	235	244	184	184	214	214	195	199
SY1609	18-23	213	213	199	199	210	219	147	147	223	229	184	184	220	235	205	215
SY1609	18-24	210	213	193	199	204	210	145	145	238	244	184	184	214	214	199	199
SY1706	19-01	210	210	193	196	204	204	149	157	232	238	184	184	214	217	199	199
SY1706	19-02	210	213	199	199	204	210	143	149	232	244	184	184	223	223	199	199
SY1706	19-03	210	213	199	199	204	204	149	157	238	241	184	184	214	214	209	211
SY1706	19-04	210	213	199	199	219	219	143	149	226	232	184	184	214	214	199	199
SY1706	19-05	210	213	196	199	204	210	149	149	232	235	184	184	214	214	199	199
SY1706	19-06	210	213	196	199	204	207	147	157	238	241	184	184	214	214	211	211
SY1707	20-01	210	213	199	199	210	213	147	147	229	232	184	184	214	223	197	203
SY1707	20-02	210	213	199	199	204	219	157	165	229	232	184	184	214	223	205	209
SY1707	20-03	210	213	196	199	192	216	147	149	238	238	184	184	214	223	199	209
SY1707	20-04	210	213	199	199	210	216	151	155	232	235	184	184	214	214	199	199
SY1707	20-05	210	213	199	199	201	207	147	169	232	235	184	184	214	214	199	209
SY1707	20-06	210	213	199	199	219	219	147	149	223	229	184	184	214	220	201	209
SY1707	20-07	210	213	193	199	201	204	149	151	223	235	184	184	214	214	201	201
SY1707	20-08	210	213	199	199	201	201	153	157	229	241	184	184	214	214	207	207
SY1707	20-09	210	213	196	199	204	219	149	169	232	235	184	184	214	223	205	213
SY1707	20-10	210	213	199	199	207	207	147	147	235	238	184	184	214	214	199	211
SY1707	20-11	213	213	199	199	210	210	147	157	223	241	184	184	214	214	201	201
SY1707	20-12	210	213	193	193	201	201	147	147	232	235	184	184	214	214	205	215
SY1707	20-13	0	0	199	199	201	219	149	151	223	244	184	184	214	223	199	199
SY1707	20-14	210	213	196	202	210	219	147	149	232	247	184	184	214	214	199	211
SY1707	20-15	210	213	199	199	183	219	147	153	238	241	184	184	214	220	205	207
SY1707	20-16	210	213	193	199	201	219	145	149	241	244	180	180	214	223	199	201
SY1707	20-17	210	213	193	199	210	221	151	151	229	235	184	184	217	217	199	199
SY1707	20-18	210	213	199	196	198	210	149	157	226	238	184	184	214	214	201	205
SY1707	20-19	210	213	196	196	198	204	157	157	226	238	184	184	214	214	201	201
SY1707	20-20	210	213	199	199	210	219	143	157	217	241	184	184	214	214	199	211
SY1707	20-21	210	213	193	199	204	204	153	165	232	238	184	184	214	214	205	207
SY1707	20-22	210	213	199	199	213	219	147	149	226	229	184	184	214	214	199	199
SY1707	20-23	210	213	196	199	201	201	149	149	229	244	184	184	214	214	209	213
SY1707	20-24	210	210	196	196	198	210	147	149	229	238	184	184	214	214	207	207
SY1708	21-01	210	213	193	199	198	204	151	151	232	235	184	180	214	214	197	205
SY1708	21-02	210	213	199	199	210	210	149	149	232	244	180	184	214	214	201	207
SY1708	21-03	210	210	196	199	210	210	147	147	223	235	184	184	214	223	199	211
SY1708	21-04	210	213	199	199	201	210	147	157	232	244	180	184	214	214	199	205
SY1708	21-05	210	213	199	199	198	210	151	151	229	232	184	184	214	217	201	209
SY1708	21-06	210	213	199	199	210	219	151	151	229	235	184	184	214	214	201	201
SY1708	21-07	210	213	196	196	201	204	159	159	235	238	184	184	214	214	199	199
SY1708	21-08	210	213	196	199	204	204	147	155	223	238	184	184	214	214	195	199
SY1708	21-09	210	213	193	193	210	219	149	153	238	241	184	184	214	214	199	209
SY1708	21-10	210	213	199	199	204	204	149	149	241	244	184	184	214	214	199	205
SY1708	21-11	210	213	199	199	207	219	151	151	232	238	180	180	214	223	199	203
SY1708	21-12	210	213	193	196	210	219	155	157	220	235	184	184	214	214	199	209
SY1708	21-13	210	213	196	199	210	210	143	151	229	238	184	184	214	214	199	199
SY1708	21-14	210	213	199	199	219	219	151	151	229	238	184	184	214	217	199	199
SY1708	21-15	210	213	196	199	219	219	149	151	232	244	182	184	211	217	199	209
SY1708	21-16	210	210	199	199	210	216	149	149	235	244	182	184	214	223	199	209
SY1708	21-17	210	210	199	199	207	221	163	163	229	235	184	184	214	214	199	199
SY1708	21-18	210	210	199	199	207	219	149	149	235	235	184	184	214	214	209	209
SY1708	21-19	210	210	199	199	201	219	147	157	229	235	184	184	214	223	209	209
SY1708	21-20	210	210	196	199	192	221	157	157	229	235	184	184	214	214	199	209
SY1708	21-21	210	213	199	199	210	210	147	147	223	241	184	184	214	214	199	217
SY1708	21-22	210	213	199	199	219	219	157	157	238	247	184	184	214	214	199	199
SY1708	21-23	210	213	199	199	213	224	149	149	223	229	184	184	214	223	199	205
SY1708	21-24	210	210	199	199	201	210	147	159	229	241	184	184	214	223	195	199
SY1709	22-01	210	210	199	199	210	210	151	151	232	232	184	184	214	214	199	199
SY1709	22-02	210	210	193	199	213	221	145	145	232	232	184	184	214	223	199	217
SY1709	22-03	210	213	193	199	204	204	149	149	229	232	0	0	214	238	203	215
SY1709	22-04	210	213	199	199	210	210	143	143	235	238	0	0	214	214	201	209
SY1709	22-05	210	213	199	202	216	216	147	147	232	244	184	184	214	238	201	201
SY1709	22-06	210	210	193	199	198	207	149	149	223	223	184	184	214	238	199	199
SY1709	22-07	210	213	196	199	201	216	133	133	226	229	184	184	214	238	201	201
SY1709	22-08	213	213	196	196	210	213	165	165	232	241	184	184	214	214	199	199
SY1709	22-09	210	213	199	199	201	216	155	155	232	244	184	184	214	214	199	199
SY1709	22-10	210	210	193	199	210	216	143	143	232	235	184	184	214	214	201	201
SY1709	22-11	210	213	199	199	204	210	147	147	244	244	180	180	214	214	211	211
SY1709	22-12	210	210	196	202	216	219	149	149	232	247	184	184	214	223	201	201
SY1709	22-13	210	210	199	199	219	219	165	165	226	238	184	184	214	223	201	201
SY1709	22-14	210	213	193	199	210	213	147	147	226	238	184	184	214	214	199	199
SY1709	22-15	210	213	199	199	207	219	165	165	238	238	184	184	214	223	199	199
SY1709	22-16	210	210	193	193	204	204	145	145	235	235	184	184	217	217	203	211
SY1709	22-17	210	210	199	199	207	213	165	165	235	244	184	184	214	223	199	199
SY1709	22-18	210	210	196	199	210	216	149	149	229	232	184	184	214	214	199	199
SY1709	22-19	210	213	196	199	204	210	147	147	235	244	180	180	214	214	205	207
SY1709	22-20	210	210	199	199	192	207	145	145	220	232	184	184	214	214	201	201
SY1709	22-21	210	213	193	199	201	201	165	165	235	235	180	184	214	214	199	199
SY1709	22-22	210	210	199	199	204	210	145	151	229	235	184	184	214	214	203	205
SY1709	22-23	210	210	196	196	210	210	129	145	232	241	184	184	214	214	201	205
SY1709	22-24	210	213	193	199	210	219	147	151	244	244	184	184	214	214	199	199
SY1710	23-01	210	213	199	202	192	210	157	165	232	235	184	184	214	214	205	199
SY1710	23-02	210	210	196	196	207	210	151	151	235	244	184	184	214	214	199	209
SY1710	23-03	210	213	193	199	216	216	149	151	223	244	184	184	214	214	203	201
SY1710	23-04	210	213	199	199	210	210	147	151	244	244	184	184	214	214	201	209
SY1710	23-05	210	210	199	199	210	210	149	153	244	244	180	184	214	214	199	199
SY1710	23-06	210	213	193	199	204	204	125	149	244	244	184	184	214	214	199	207
SY1710	23-07	210	213	193	199	204	210	143	163	232	247	184	184	214	214	207	199
SY1710	23-08	210	213	193	199	210	210	147	155	229	232	180	184	214	214	199	213
SY1710	23-09	210	213	196	199	192	213	147	149	223	235	184	184	214	223	201	205
SY1710	23-10	210	213	193	199	210	210	133	149	232	232	184	184	214	214	199	209
SY1710	23-11	210	213	199	199	219	219	149	149	232	247	184	184	217	217	209	199
SY1710	23-12	210	210	199	199	210	210	147	149	229	235	184	184	214	214	199	201
SY1710	23-13	210	213	196	199	192	210	147	149	232	235	184	184	214	214	201	199
SY1710	23-14	210	213	199	199	201	224	147	157	229	244	184	184	214	214	199	207
SY1710	23-15	210	213	196	199	219	219	143	157	229	235	184	184	214	223	199	201
SY1710	23-16	210	213	199	199	210	210	167	167	232	238	184	184	214	223	201	209
SY1710	23-17	210	210	193	199	207	210	147	167	229	235	184	184	214	223	209	209
SY1710	23-18	210	213	199	199	207	210	163	167	229	235	180	180	214	214	199	199
SY1710	23-19	210	210	193	193	210	219	149	157	226	232	184	184	214	214	199	199
SY1710	23-20	210	213	196	199	201	201	149	155	235	235	184	184	214	214	199	213
SY1710	23-21	210	210	199	199	201	224	149	157	226	235	184	184	214	214	199	209
SY1710	23-22	210	210	199	199	204	219	149	149	232	235	184	184	214	223	209	211
SY1710	23-23	210	213	199	199	216	216	149	149	226	241	184	184	214	214	199	201
SY1710	23-24	210	213	196	205	201	219	155	155	235	244	180	184	214	214	201	205
SY1807	24-01	210	213	199	199	192	204	143	147	229	235	184	184	214	223	201	209
SY1807	24-02	210	213	199	199	201	201	147	157	232	244	184	184	214	214	201	201
SY1807	24-03	210	213	199	199	204	204	147	157	232	235	184	184	214	214	203	203
SY1807	24-04	210	213	199	199	204	210	147	157	220	235	184	184	214	223	199	207
SY1807	24-05	210	213	199	199	207	219	143	157	223	238	184	184	214	214	209	209
SY1807	24-06	210	213	199	199	213	219	151	163	235	235	180	184	214	223	201	203
SY1807	24-07	210	210	199	199	201	201	143	143	244	244	0	0	214	214	201	201
SY1807	24-08	210	213	199	199	219	219	143	143	238	244	184	184	214	214	199	199
SY1807	24-09	210	213	199	199	204	219	149	165	238	241	184	184	214	217	199	209
SY1807	24-10	201	210	199	199	210	216	143	143	226	232	184	184	214	214	201	201
SY1807	24-11	210	210	199	199	210	219	151	151	235	235	180	184	220	220	199	205
SY1807	24-12	210	213	199	199	210	213	143	149	235	235	184	184	214	214	199	209
SY1807	24-13	210	213	199	199	201	219	149	151	235	238	184	184	214	217	201	207
SY1807	24-14	210	213	199	199	210	213	153	149	232	235	184	184	214	214	199	209
SY1807	24-15	210	213	199	199	0	0	143	143	235	235	184	184	214	214	199	207
SY1807	24-16	210	213	199	199	213	221	143	143	226	232	0	0	214	223	201	201
SY1807	24-17	210	213	199	199	210	221	147	149	235	244	184	184	214	214	201	211
SY1807	24-18	210	213	199	199	198	219	147	151	229	238	180	184	214	214	201	203
SY1807	24-19	210	213	199	199	210	210	147	155	223	238	180	184	214	214	209	213
SY1807	24-20	210	213	199	199	216	216	149	149	226	244	184	184	214	214	209	209
SY1808	25-01	210	213	199	199	210	210	155	157	235	244	184	184	214	223	201	201
SY1808	25-02	210	213	199	199	210	219	149	149	232	235	184	184	214	220	201	209
SY1808	25-03	210	213	199	199	204	210	147	149	235	235	184	184	214	214	199	213
SY1808	25-04	210	213	199	199	198	210	143	149	217	226	184	184	214	223	201	209
SY1808	25-05	210	210	199	199	201	201	145	145	232	238	184	184	223	223	201	201
SY1808	25-06	210	213	199	199	207	213	147	147	226	229	184	184	214	223	199	199
SY1808	25-07	210	210	199	199	198	198	149	159	235	235	184	184	214	214	201	209
SY1808	25-08	201	210	199	199	210	216	151	145	235	235	0	0	214	214	199	201
SY1808	25-09	210	210	199	199	210	219	151	149	229	235	184	184	214	214	201	201
SY1808	25-10	210	213	199	199	210	219	145	151	226	235	184	184	214	214	199	199
SY1808	25-11	210	210	199	199	210	210	143	149	223	223	0	0	214	214	0	0
SY1808	25-12	210	213	199	199	204	210	143	149	232	232	184	184	214	214	209	209
SY1808	25-13	210	213	199	199	210	216	149	149	226	235	184	184	214	214	199	199
SY1808	25-14	210	213	199	199	198	213	157	155	232	241	184	184	214	214	201	205
SY1808	25-15	210	213	199	199	0	0	149	149	229	244	184	184	214	217	201	207
SY1808	25-16	210	213	199	199	219	219	149	157	235	235	180	184	214	214	199	199
SY1808	25-17	210	213	199	199	210	219	147	151	232	235	0	0	214	214	199	209
SY1808	25-18	210	213	199	199	192	210	151	143	229	247	180	180	214	214	199	199
SY1808	25-19	210	213	199	199	216	216	149	151	229	235	184	184	214	223	199	199
SY1808	25-20	210	213	199	199	201	213	163	151	235	244	180	184	214	214	199	207
SY1809	26-01	210	213	199	199	219	219	135	155	223	235	184	184	214	214	209	209
SY1809	26-02	210	213	199	199	201	207	149	151	229	235	184	184	214	214	199	211
SY1809	26-03	210	213	199	199	219	219	149	149	229	232	184	184	214	214	201	205
SY1809	26-04	210	213	193	199	192	219	143	151	235	235	184	184	214	214	201	209
SY1809	26-05	210	213	199	199	198	198	145	153	232	241	184	184	214	214	199	199
SY1809	26-06	210	210	199	199	204	213	155	143	0	0	184	184	214	223	201	201
SY1809	26-07	210	213	199	199	207	207	159	147	232	235	184	184	214	214	199	211
SY1809	26-08	210	213	193	199	210	210	149	151	235	235	184	184	214	214	201	201
SY1809	26-09	210	213	199	199	204	213	149	157	232	244	184	184	214	214	199	209
SY1809	26-10	210	210	199	199	204	210	147	157	217	232	180	184	214	214	203	203
SY1809	26-11	210	213	199	199	210	210	157	149	235	247	184	184	214	214	201	209
SY1809	26-12	210	213	199	199	210	210	149	149	235	247	184	184	214	214	201	209
SY1809	26-13	210	213	193	199	213	213	151	159	223	238	0	0	214	214	201	201
SY1809	26-14	210	213	199	199	210	221	147	153	232	244	184	184	214	214	199	209
SY1809	26-15	201	210	199	199	219	219	147	147	223	229	0	0	220	223	199	199
SY1809	26-16	210	210	199	199	219	219	151	157	223	235	184	184	214	214	205	209
SY1809	26-17	210	213	193	202	219	219	149	157	217	238	184	184	214	214	196	209
SY1809	26-18	210	213	199	199	210	210	147	163	226	238	184	184	214	214	209	209
SY1809	26-19	210	213	199	199	213	219	149	153	235	244	184	184	214	223	199	199
SY1809	26-20	210	210	199	199	192	198	147	149	235	244	184	184	214	214	203	203
SY1810	27-01	210	213	193	199	204	210	167	157	229	235	184	184	214	214	199	199
SY1810	27-02	210	213	199	199	198	210	157	157	223	232	180	180	214	214	209	209
SY1810	27-03	210	213	196	199	198	219	155	155	238	241	184	184	214	214	199	207
SY1810	27-04	210	213	199	199	204	210	149	153	229	247	184	184	214	223	201	203
SY1810	27-05	210	210	199	199	204	204	147	155	232	235	0	0	214	214	205	205
SY1810	27-06	210	210	193	199	204	213	153	149	235	235	184	184	214	214	199	209
SY1810	27-07	210	213	196	199	207	219	149	157	232	241	0	0	214	217	209	211
SY1810	27-08	210	213	193	199	204	219	149	165	229	235	184	184	214	214	205	205
SY1810	27-09	210	213	199	199	204	210	147	165	235	244	184	184	214	214	199	199
SY1810	27-10	210	210	199	199	201	201	147	167	244	244	184	184	214	223	199	199
SY1810	27-11	210	210	196	199	201	213	155	151	232	235	184	184	214	214	199	203
SY1810	27-12	210	213	199	202	210	207	147	165	226	235	184	184	214	214	201	201
SY1810	27-13	210	213	199	199	219	219	157	149	223	235	184	184	214	217	205	211
SY1810	27-14	210	210	199	199	204	219	151	165	235	235	184	184	214	214	201	205
SY1810	27-15	210	210	199	199	204	210	149	149	235	241	184	184	214	214	201	209
SY1810	27-16	210	210	199	199	207	219	147	157	229	235	184	184	220	223	201	201
SY1810	27-17	210	213	199	199	210	210	153	149	235	238	184	184	214	214	209	209
SY1810	27-18	201	210	199	199	201	216	149	165	232	235	184	184	214	214	207	207
SY1810	27-19	210	213	199	199	210	216	149	151	220	220	184	184	214	214	199	209
SY1810	27-20	210	210	199	199	219	219	151	157	229	235	180	180	214	214	199	211
SY1811	28-01	210	213	193	202	210	213	147	149	220	220	184	184	214	223	199	209
SY1811	28-02	210	213	199	202	210	210	149	165	235	244	184	184	214	217	199	199
SY1811	28-03	210	210	193	199	222	227	147	157	226	238	184	184	214	214	199	211
SY1811	28-04	210	213	199	199	210	207	149	153	220	232	184	184	214	214	199	205
SY1811	28-05	210	213	199	199	204	219	149	165	241	241	184	184	214	223	199	211
SY1811	28-06	210	213	199	199	219	219	147	151	235	235	184	184	214	235	201	211
SY1811	28-07	210	210	199	199	192	219	149	155	229	235	184	184	214	223	201	217
SY1811	28-08	210	210	193	199	213	213	153	159	223	238	184	184	214	220	205	209
SY1811	28-09	210	213	196	199	204	210	145	149	226	244	180	180	214	217	199	199
SY1811	28-10	210	213	193	199	204	210	149	149	229	235	0	0	214	214	205	205
SY1811	28-11	210	213	199	199	210	216	147	147	235	238	184	184	214	214	199	199
SY1811	28-12	210	213	199	199	210	219	145	149	235	235	184	184	214	214	199	209
SY1811	28-13	210	213	196	199	192	204	135	143	235	238	184	184	214	223	199	209
SY1811	28-14	210	213	199	202	210	219	143	147	232	235	184	184	214	214	205	209
SY1811	28-15	210	213	193	199	204	219	165	149	232	244	184	184	214	223	199	199
SY1811	28-16	210	213	199	199	207	210	149	151	229	232	0	0	214	214	0	0
SY1811	28-17	210	213	199	199	207	219	151	149	214	232	184	184	214	214	199	199
SY1811	28-18	0	0	196	199	198	213	147	153	244	244	184	184	214	223	201	205
SY1811	28-19	213	213	199	199	201	207	147	149	226	232	180	184	214	214	199	199
SY1811	28-20	210	213	199	199	216	219	143	157	235	238	184	184	214	214	205	209
SY1907	29-01	210	210	196	196	207	219	145	157	220	226	182	182	199	208	213	223
SY1907	29-02	210	210	193	196	210	219	147	147	220	232	0	0	205	211	213	223
SY1907	29-03	210	210	199	199	207	210	149	149	220	232	0	0	205	211	213	221
SY1907	29-04	210	213	199	199	204	216	145	145	235	235	182	182	199	205	213	223
SY1907	29-05	210	213	199	199	201	221	145	149	223	244	178	178	199	202	215	219
SY1907	29-06	210	213	199	202	219	219	145	145	232	232	182	182	199	202	213	213
SY1907	29-07	210	210	196	196	210	219	147	147	223	235	182	182	199	205	213	213
SY1907	29-08	210	213	196	196	219	219	147	147	229	232	182	182	202	208	215	215
SY1907	29-09	210	210	193	193	0	0	151	151	235	244	180	180	199	199	215	223
SY1907	29-10	210	213	193	196	204	219	147	147	235	241	182	182	202	208	213	213
SY1907	29-11	210	219	193	193	201	210	147	147	235	250	0	0	199	199	213	221
SY1907	29-12	210	210	193	196	207	207	145	145	226	247	182	182	202	208	213	225
SY1907	29-13	210	210	196	199	204	219	145	145	232	244	182	182	199	199	213	213
SY1907	29-14	210	210	199	199	219	219	147	157	238	241	0	0	199	205	213	221
SY1907	29-15	210	210	196	196	207	207	147	155	235	241	182	182	202	205	213	213
SY1907	29-16	210	210	196	196	210	221	149	157	235	241	182	182	199	208	213	219
SY1907	29-17	210	213	196	196	204	210	141	149	226	229	182	182	199	205	213	221
SY1907	29-18	210	213	196	196	204	219	161	161	232	235	182	182	205	205	213	213
SY1907	29-19	210	213	196	199	207	213	149	149	229	235	182	182	199	208	213	213
SY1907	29-20	0	0	193	196	219	219	145	149	232	232	182	182	199	205	213	213
SY1907	29-21	210	213	196	196	198	219	145	145	235	238	182	182	199	214	213	223
SY1907	29-22	210	210	190	196	213	216	145	149	235	244	182	182	202	202	215	221
SY1907	29-23	213	216	190	199	210	213	145	145	232	241	0	0	196	199	213	213
SY1907	29-24	210	210	199	199	201	210	149	155	235	235	182	182	202	208	213	223
SY1908	30-01	210	213	196	196	192	192	155	173	244	247	182	182	199	199	213	213
SY1908	30-02	210	213	190	196	192	219	145	145	244	253	182	182	199	202	213	213
SY1908	30-03	210	210	196	196	219	221	141	139	220	235	182	182	199	205	213	221
SY1908	30-04	210	210	196	196	207	213	147	147	229	244	182	182	199	199	213	219
SY1908	30-05	210	213	193	196	195	210	147	151	226	232	180	180	208	208	213	221
SY1908	30-06	210	210	193	196	195	219	147	147	235	244	182	182	199	211	213	213
SY1908	30-07	210	210	193	196	201	210	147	147	223	229	182	182	208	208	213	213
SY1908	30-08	210	213	190	196	204	213	145	145	223	244	178	178	199	208	213	213
SY1908	30-09	210	213	193	196	201	221	147	157	229	244	182	182	199	211	207	213
SY1908	30-10	210	210	193	196	192	216	147	147	223	238	182	182	196	199	219	219
SY1908	30-11	210	213	199	199	219	219	145	145	235	235	180	184	208	208	213	213
SY1908	30-12	210	210	193	196	207	219	145	145	235	244	180	180	199	199	213	213
SY1908	30-13	210	213	199	199	201	210	141	139	220	235	182	182	211	214	213	223
SY1908	30-14	210	210	193	193	201	207	145	149	244	244	182	182	199	208	213	213
SY1908	30-15	210	213	196	199	207	221	149	149	241	241	182	182	205	208	221	221
SY1908	30-16	210	213	199	199	201	210	149	155	229	232	182	182	199	199	213	213
SY1908	30-17	210	213	190	193	219	219	147	153	232	244	182	182	199	199	215	221
SY1908	30-18	210	210	193	196	219	227	145	145	235	253	182	182	199	202	219	221
SY1908	30-19	210	210	196	196	201	219	147	153	232	253	170	182	199	199	213	219
SY1908	30-20	210	210	190	193	210	224	141	159	229	235	182	182	199	199	213	221
SY1908	30-21	210	213	196	196	201	213	153	153	235	235	182	182	208	208	203	213
SY1908	30-22	210	213	190	196	207	216	141	145	232	235	182	182	199	199	213	215
SY1908	30-23	0	0	193	196	210	219	141	155	235	244	182	182	199	199	213	213
SY1908	30-24	210	210	199	199	204	207	147	147	229	244	180	180	199	199	213	213
SY1909	31-01	210	213	193	196	204	216	141	139	229	235	0	0	199	199	213	213
SY1909	31-02	210	213	193	196	219	221	145	145	226	241	182	182	199	199	213	213
SY1909	31-03	210	213	196	196	219	219	145	145	232	235	182	182	199	205	213	213
SY1909	31-04	210	213	196	196	195	221	147	147	226	232	182	182	199	208	213	213
SY1909	31-05	210	213	199	199	210	213	161	165	235	253	182	182	208	214	213	213
SY1909	31-06	213	213	199	199	210	210	147	167	229	235	182	182	199	202	221	221
SY1909	31-07	210	210	199	199	210	219	145	145	229	235	182	182	199	211	213	213
SY1909	31-08	210	210	196	196	210	210	145	145	241	244	182	182	205	208	213	219
SY1909	31-09	210	210	196	196	219	219	147	147	235	235	182	182	199	199	213	221
SY1909	31-10	210	210	190	196	213	216	147	147	223	244	182	182	199	202	213	213
SY1909	31-11	210	213	196	199	210	216	171	171	229	229	182	182	199	208	213	221
SY1909	31-12	210	213	199	199	210	210	141	145	220	223	180	180	199	199	213	217
SY1909	31-13	210	210	199	199	219	219	141	163	223	232	182	182	199	199	213	213
SY1909	31-14	210	213	199	199	210	219	149	157	232	235	182	182	199	211	213	213
SY1909	31-15	210	210	196	196	201	201	141	139	223	247	174	178	199	199	213	213
SY1909	31-16	210	213	196	199	204	219	155	163	229	235	0	0	208	208	213	213
SY1909	31-17	210	213	193	199	210	213	145	145	223	229	182	182	199	205	213	213
SY1909	31-18	213	216	199	199	201	204	145	163	232	238	182	182	199	208	213	213
SY1909	31-19	210	210	193	196	219	219	147	147	226	235	182	182	208	208	203	213
SY1909	31-20	210	210	196	199	195	219	147	147	232	232	182	182	199	208	213	219
SY1909	31-21	210	213	199	199	210	213	143	143	238	238	182	182	199	199	213	213
SY1909	31-22	210	213	190	196	207	207	147	167	217	220	182	182	193	208	213	213
SY1909	31-23	210	213	199	199	192	219	151	151	229	253	182	182	202	202	213	215
SY1909	31-24	210	213	199	199	210	210	145	145	229	232	182	182	199	199	213	213
SY1910	32-01	210	213	196	196	219	219	145	155	235	235	180	180	199	199	211	211
SY1910	32-02	210	213	196	199	219	221	143	143	223	256	182	182	199	199	213	213
SY1910	32-03	210	210	193	196	195	219	149	149	223	235	180	180	199	205	213	213
SY1910	32-04	210	210	199	199	192	219	145	145	238	244	164	182	199	205	213	213
SY1910	32-05	210	213	199	199	207	207	147	147	223	232	162	162	205	208	213	213
SY1910	32-06	210	213	199	199	204	204	147	151	232	235	182	182	199	208	213	221
SY1910	32-07	210	210	190	193	192	207	149	167	232	235	182	182	199	199	213	221
SY1910	32-08	210	210	190	190	213	221	159	159	223	229	182	182	199	199	213	213
SY1910	32-09	210	213	193	196	201	210	145	151	223	229	182	182	199	208	215	221
SY1910	32-10	210	213	196	199	192	210	147	147	238	238	182	182	199	205	213	223
SY1910	32-11	210	213	199	199	213	219	145	145	217	235	182	182	196	205	213	223
SY1910	32-12	210	213	199	202	204	216	143	151	229	235	164	164	199	199	213	223
SY1910	32-13	210	213	199	199	201	204	141	147	229	232	182	182	199	199	213	213
SY1910	32-14	210	213	190	190	210	219	147	147	235	241	182	182	199	202	213	215
SY1910	32-15	210	210	199	199	207	207	143	147	238	241	182	182	199	208	213	213
SY1910	32-16	210	210	199	199	207	221	147	155	238	247	182	182	205	205	213	223
SY1910	32-17	210	213	196	199	207	207	143	145	235	235	0	0	199	199	213	223
SY1910	32-18	210	210	199	199	210	219	147	147	226	229	182	182	199	202	213	223
SY1910	32-19	210	210	190	196	204	204	145	147	235	244	182	182	202	202	213	223
SY1910	32-20	210	213	193	196	207	207	141	145	232	232	182	182	202	208	213	223
SY1910	32-21	210	213	193	196	204	204	163	163	238	241	180	182	205	208	213	223
SY1910	32-22	210	213	199	199	207	219	147	147	217	235	182	182	199	208	213	213
SY1910	32-23	210	213	196	199	210	219	161	161	232	241	182	182	199	199	213	213
SY1910	32-24	210	213	193	196	201	210	153	167	217	250	182	182	199	208	213	213
SY1911	33-01	210	213	199	199	201	219	141	147	226	244	180	182	202	202	213	221
SY1911	33-02	210	216	199	199	216	219	169	171	229	244	182	184	199	208	213	219
SY1911	33-03	210	213	196	199	198	207	141	147	241	244	180	182	208	211	213	213
SY1911	33-04	210	213	196	199	207	207	143	145	232	247	180	182	199	205	213	219
SY1911	33-05	210	213	196	199	207	213	145	149	226	229	180	182	205	205	213	213
SY1911	33-06	210	213	196	199	204	219	147	161	220	232	190	192	199	199	213	213
SY1911	33-07	210	213	199	199	210	216	141	145	235	238	182	194	208	208	213	213
SY1911	33-08	210	213	196	202	216	219	147	171	226	235	180	182	199	199	213	213
SY1911	33-09	210	213	196	199	198	219	149	155	232	235	182	184	199	199	213	219
SY1911	33-10	210	213	193	196	204	207	143	147	235	244	180	182	208	217	213	213
SY1911	33-11	210	213	199	199	192	207	145	145	232	235	182	182	199	211	213	213
SY1911	33-12	210	213	199	199	210	213	143	143	229	229	0	0	199	208	213	245
SY1911	33-13	210	210	199	199	201	219	153	157	235	235	180	182	199	199	213	215
SY1911	33-14	210	213	199	199	192	192	133	147	232	244	184	184	199	199	213	213
SY1911	33-15	210	213	196	199	201	219	145	149	229	241	180	182	199	199	213	213
SY1911	33-16	210	210	199	199	204	204	151	151	235	235	0	0	0	0	0	0
SY1911	33-17	210	213	199	202	192	219	153	155	232	247	0	0	0	0	0	0
SY1911	33-18	210	213	196	199	207	207	147	147	238	244	180	182	199	214	213	213
SY1911	33-19	210	213	196	199	198	213	145	151	238	241	180	182	196	211	219	219
SY1911	33-20	210	210	196	199	210	216	145	149	229	232	180	182	199	202	213	213
SY1911	33-21	210	213	196	199	201	210	145	147	235	235	180	182	199	199	213	213
SY1911	33-22	210	213	196	202	219	221	143	147	223	235	178	182	199	208	213	219
SY1911	33-23	210	213	199	199	198	207	143	147	226	232	180	182	199	214	213	213
SY1911	33-24	210	213	193	199	207	219	147	151	217	229	182	184	199	199	213	213
SY2007	34-01	210	213	199	199	201	216	141	147	232	241	180	182	202	208	213	213
SY2007	34-02	210	210	199	199	204	213	155	155	229	235	180	182	199	205	213	213
SY2007	34-03	210	213	196	199	207	207	143	145	235	238	180	182	199	205	213	213
SY2007	34-04	210	210	199	199	204	219	147	147	229	232	180	182	199	208	213	215
SY2007	34-05	213	213	199	199	219	219	153	155	229	241	180	182	205	214	213	213
SY2007	34-06	210	213	199	199	213	213	147	149	235	238	180	182	202	202	213	219
SY2007	34-07	210	210	196	199	198	219	147	149	229	232	180	182	205	211	213	213
SY2007	34-08	210	213	193	196	207	210	153	153	232	232	180	182	196	208	213	215
SY2007	34-09	210	213	199	199	198	198	151	157	217	232	178	178	199	205	213	213
SY2007	34-10	210	213	196	199	207	207	145	147	235	247	180	182	199	199	213	213
SY2007	34-11	210	213	196	199	192	207	147	147	235	244	164	182	199	208	213	221
SY2007	34-12	210	210	202	202	192	219	151	155	217	241	180	182	199	205	213	213
SY2007	34-13	210	213	199	199	198	219	145	153	232	235	180	182	196	205	213	215
SY2007	34-14	210	213	199	199	207	210	143	145	229	232	182	184	199	199	213	219
SY2007	34-15	210	213	193	196	210	219	145	147	229	244	180	182	208	208	213	213
SY2007	34-16	210	213	196	196	195	198	147	173	235	235	180	182	199	205	213	213
SY2007	34-17	210	213	196	199	210	219	151	155	226	238	182	190	199	220	215	215
SY2007	34-18	210	210	199	199	195	216	147	147	244	244	180	182	199	199	215	215
SY2007	34-19	210	213	196	199	192	201	141	145	232	235	180	180	199	211	219	219
SY2007	34-20	213	213	196	199	198	219	149	149	235	235	180	182	199	208	213	221
SY2007	34-21	210	213	199	199	213	219	157	159	232	238	164	182	199	202	213	213
SY2007	34-22	210	213	199	199	192	219	147	147	220	232	180	182	199	199	213	213
SY2007	34-23	210	213	196	199	207	210	141	149	229	235	180	182	199	208	213	213
SY2007	34-24	210	213	199	199	207	207	153	161	229	235	164	182	199	205	213	213
SY2008	35-01	210	213	196	199	216	219	153	153	235	238	180	182	199	199	213	221
SY2008	35-02	210	213	199	199	219	219	145	147	241	244	180	182	202	202	213	219
SY2008	35-03	210	210	193	196	198	204	147	151	235	238	180	182	202	208	213	213
SY2008	35-04	210	213	199	199	213	219	153	161	229	229	180	182	199	214	213	221
SY2008	35-05	210	210	196	199	198	201	143	147	232	235	0	0	202	202	213	213
SY2008	35-06	201	210	199	199	207	210	143	151	238	244	164	164	199	205	213	213
SY2008	35-07	210	213	199	199	207	210	145	145	235	244	176	178	199	205	213	221
SY2008	35-08	210	213	196	199	207	219	143	147	232	235	180	182	199	199	213	213
SY2008	35-09	210	213	193	196	201	219	147	147	229	241	180	182	196	205	213	213
SY2008	35-10	210	210	199	199	213	219	139	147	229	232	178	182	199	199	213	213
SY2008	35-11	210	213	199	199	219	219	149	149	226	235	180	182	199	208	213	213
SY2008	35-12	204	207	196	202	192	213	147	159	235	244	180	182	199	208	213	213
SY2008	35-13	210	213	199	199	207	219	147	147	235	235	182	182	208	208	213	213
SY2008	35-14	210	213	196	196	192	207	145	151	235	241	184	184	0	0	0	0
SY2008	35-15	210	213	199	202	213	219	149	159	238	244	180	182	211	214	213	213
SY2008	35-16	210	213	199	199	201	207	147	157	226	226	180	182	199	208	213	219
SY2008	35-17	210	213	193	196	210	219	145	145	235	238	180	182	199	199	217	217
SY2008	35-18	210	213	199	199	198	201	145	153	229	229	180	182	199	208	213	221
SY2008	35-19	210	213	196	199	183	201	141	159	235	235	178	182	199	199	213	213
SY2008	35-20	210	213	199	199	210	210	161	165	229	238	180	182	199	208	213	221
SY2008	35-21	210	213	199	199	207	219	157	161	235	244	180	182	199	208	213	213
SY2008	35-22	210	213	196	199	198	207	151	155	232	244	180	182	202	208	213	213
SY2008	35-23	210	213	196	199	216	219	143	147	229	235	180	182	199	202	213	221
SY2008	35-24	210	213	199	199	198	219	147	151	226	244	198	200	202	202	213	219
SY2009	36-01	210	213	199	199	210	219	141	149	232	238	182	182	199	205	213	213
SY2009	36-02	210	213	196	196	207	207	149	153	220	235	182	182	208	208	213	219
SY2009	36-03	210	213	202	202	207	207	145	145	232	238	180	182	199	199	213	213
SY2009	36-04	210	213	193	199	219	219	147	153	232	235	0	0	208	208	213	213
SY2009	36-05	210	213	199	199	207	210	149	153	229	247	180	182	205	208	213	213
SY2009	36-06	210	213	199	199	207	216	161	173	220	235	178	178	199	202	211	211
SY2009	36-07	210	213	193	196	207	210	145	145	235	238	176	178	199	205	213	213
SY2009	36-08	210	213	196	199	198	219	149	159	235	238	180	182	199	214	213	213
SY2009	36-09	210	213	193	199	198	213	147	147	238	247	180	182	199	205	213	213
SY2009	36-10	210	213	196	199	210	219	149	159	226	232	180	182	199	205	213	213
SY2009	36-11	207	210	199	199	216	219	145	149	235	238	182	184	199	199	213	213
SY2009	36-12	210	213	196	199	207	219	149	155	229	238	180	182	199	214	213	213
SY2009	36-13	210	213	199	199	204	207	145	149	229	232	182	184	199	205	207	213
SY2009	36-14	210	213	199	199	204	219	147	157	235	235	182	184	199	202	213	213
SY2009	36-15	210	213	193	196	204	207	143	147	226	229	180	182	199	199	213	213
SY2009	36-16	210	213	199	199	198	207	137	139	214	244	186	188	199	211	213	213
SY2009	36-17	210	213	199	199	207	210	145	155	235	238	180	182	199	205	213	213
SY2009	36-18	210	213	196	199	207	207	147	155	223	244	180	182	199	211	213	213
SY2009	36-19	210	213	199	199	210	219	141	145	223	238	180	182	199	199	213	213
SY2009	36-20	210	213	193	196	195	219	147	153	229	232	164	182	199	202	213	213
SY2009	36-21	210	213	199	199	210	216	151	161	232	235	180	182	199	199	213	213
SY2009	36-22	210	210	199	199	219	219	147	179	232	244	182	184	205	211	213	213
SY2009	36-23	210	216	199	199	201	207	147	177	226	232	180	182	208	208	213	213
SY2009	36-24	210	213	199	199	207	207	141	153	232	235	180	182	199	208	213	213
SY2010	37-01	210	213	193	196	207	219	143	149	229	238	180	182	208	214	213	213
SY2010	37-02	210	213	196	196	207	207	143	145	229	238	180	182	199	202	213	221
SY2010	37-03	210	213	193	196	195	198	145	145	238	241	176	178	199	208	213	213
SY2010	37-04	210	213	193	193	207	219	143	149	235	235	180	182	199	199	213	213
SY2010	37-05	210	210	199	199	195	207	143	147	238	241	180	182	199	205	213	213
SY2010	37-06	210	213	196	196	207	207	141	145	235	241	180	182	205	208	213	213
SY2010	37-07	210	213	193	196	210	210	141	143	232	232	180	182	199	205	213	213
SY2010	37-08	210	213	196	196	201	207	161	175	235	238	180	182	205	205	213	215
SY2010	37-09	210	213	196	196	198	219	149	149	229	232	180	182	199	199	213	213
SY2010	37-10	210	213	193	193	210	219	145	167	229	232	180	182	199	199	213	213
SY2010	37-11	210	213	190	190	207	207	145	149	235	238	180	182	199	199	213	213
SY2010	37-12	210	213	193	196	201	207	153	155	235	244	180	182	199	205	213	213
SY2010	37-13	210	210	196	196	210	219	159	163	226	229	180	182	199	205	213	213
SY2010	37-14	210	210	190	196	198	219	151	153	232	232	180	182	202	208	213	213
SY2010	37-15	210	210	196	196	219	219	145	145	241	253	160	182	199	199	213	213
SY2010	37-16	210	213	193	196	216	216	143	147	232	244	180	182	199	205	213	213
SY2010	37-17	210	210	196	196	204	219	147	153	220	235	180	182	205	226	213	213
SY2010	37-18	210	213	196	205	198	207	143	145	235	238	182	184	199	202	213	213
SY2010	37-19	210	213	196	196	201	213	145	153	238	238	180	182	199	214	213	215
SY2010	37-20	210	213	193	196	207	219	143	143	226	244	180	182	199	208	213	219
SY2010	37-21	210	216	190	196	207	219	143	147	232	235	180	182	199	205	213	213
SY2010	37-22	210	213	196	196	207	219	153	153	223	226	178	182	208	208	213	213
SY2010	37-23	210	213	193	196	198	207	143	143	232	232	180	182	205	208	213	213
SY2010	37-24	210	213	196	196	207	207	141	143	226	238	180	182	199	205	213	219
SY2011	38-01	210	213	193	196	207	219	143	145	223	232	180	182	199	199	213	221
SY2011	38-02	210	213	196	196	207	213	143	143	232	244	164	180	199	205	213	221
SY2011	38-03	210	213	193	196	201	207	165	167	232	238	178	180	199	208	213	221
SY2011	38-04	210	210	196	196	207	207	141	143	214	235	180	182	199	199	213	219
SY2011	38-05	210	210	196	196	192	219	143	149	238	241	180	188	199	202	213	215
SY2011	38-06	210	210	193	196	219	219	141	139	232	232	180	182	199	199	213	221
SY2011	38-07	210	213	196	196	201	213	143	145	235	238	180	182	199	202	213	213
SY2011	38-08	210	213	190	193	207	219	147	173	235	235	180	182	202	214	213	213
SY2011	38-09	210	213	196	196	201	219	147	153	235	244	180	182	196	211	213	213
SY2011	38-10	210	213	190	196	198	198	143	165	244	244	180	182	205	205	213	213
SY2011	38-11	210	213	193	196	219	219	143	147	223	229	180	182	199	202	213	213
SY2011	38-12	210	210	196	199	207	207	141	151	235	238	180	182	199	214	213	213
SY2011	38-13	210	210	196	196	213	213	143	149	229	244	182	184	199	199	213	213
SY2011	38-14	210	213	196	196	198	198	141	143	229	232	180	182	199	199	213	221
SY2011	38-15	210	213	196	196	219	219	147	151	223	238	160	182	199	205	207	215
SY2011	38-16	210	213	190	196	207	207	147	155	223	229	180	182	205	214	221	221
SY2011	38-17	210	213	196	196	213	219	145	145	223	232	180	182	199	205	213	213
SY2011	38-18	210	213	196	199	207	216	147	147	229	232	180	182	202	205	213	215
SY2011	38-19	210	213	193	193	207	207	147	149	226	238	180	182	199	211	213	213
SY2011	38-20	210	210	193	196	207	207	145	149	220	244	180	182	199	199	213	221
SY2011	38-21	207	210	196	196	195	207	145	147	235	244	180	182	202	211	213	221
SY2011	38-22	210	210	193	196	219	221	143	145	232	235	180	182	199	202	213	213
SY2011	38-23	210	213	196	196	216	219	143	157	235	241	180	182	199	205	213	213
SY2011	38-24	210	210	193	196	201	210	157	161	232	235	180	182	199	205	213	213
SY2106	39-01	210	213	196	196	219	221	141	147	229	244	180	182	205	205	213	219
SY2106	39-02	210	213	196	196	204	207	159	167	235	238	180	182	202	208	213	215
SY2107	40-01	210	213	196	196	210	219	145	153	220	238	180	182	199	199	213	219
SY2107	40-02	210	213	196	196	210	219	147	147	238	238	180	182	208	208	213	213
SY2107	40-03	210	210	196	196	204	207	149	153	229	241	180	182	208	208	213	213
SY2107	40-04	210	210	196	196	207	207	143	143	235	244	180	182	199	199	213	213
SY2107	40-05	210	213	196	199	198	207	149	167	232	232	180	182	199	199	213	221
SY2107	40-06	210	213	193	196	216	216	151	151	226	238	180	182	199	199	213	219
SY2107	40-07	210	213	193	196	207	207	145	147	226	244	182	190	199	205	213	213
SY2107	40-08	210	213	193	199	207	207	143	161	229	235	180	182	199	199	213	213
SY2107	40-09	210	213	196	196	198	219	143	145	235	235	194	194	199	199	213	221
SY2107	40-10	210	213	193	196	192	198	155	155	232	235	180	182	199	199	213	213
SY2107	40-11	210	213	193	196	204	219	143	153	217	235	180	182	208	214	213	213
SY2107	40-12	210	213	193	196	207	207	147	159	235	247	182	184	199	199	213	213
SY2107	40-13	210	213	193	196	201	221	151	155	226	232	180	182	199	208	213	213
SY2107	40-14	210	213	193	196	207	219	141	147	232	235	180	182	199	205	213	213
SY2107	40-15	210	210	193	196	198	219	149	157	232	238	180	182	199	208	213	213
SY2107	40-16	210	213	193	196	207	207	155	155	235	244	180	182	205	220	213	213
SY2107	40-17	210	213	193	196	198	198	143	153	232	235	180	182	205	205	213	215
SY2107	40-18	210	210	193	199	210	216	147	147	229	244	182	184	199	199	213	213
SY2107	40-19	210	213	196	199	207	210	173	173	232	241	184	186	199	199	215	221
SY2107	40-20	210	213	196	196	195	207	143	145	235	235	180	182	199	199	213	213
SY2107	40-21	210	213	196	205	201	216	143	165	229	241	184	184	199	199	213	213
SY2107	40-22	210	213	193	196	219	219	141	145	220	235	180	182	205	208	213	221
SY2107	40-23	210	213	196	196	201	219	139	145	229	232	180	182	199	205	213	221
SY2107	40-24	207	210	196	196	198	207	147	149	223	235	180	182	199	199	213	213
SY2108	41-01	210	213	193	193	207	213	147	151	229	244	180	182	199	199	213	221
SY2108	41-02	210	213	193	193	207	207	147	151	229	244	180	182	199	199	213	221
SY2108	41-03	210	213	193	196	207	219	143	143	232	235	180	182	199	208	213	213
SY2108	41-04	210	213	196	196	207	210	159	161	226	244	180	182	205	208	213	215
SY2108	41-05	213	216	199	199	213	219	147	147	220	235	182	184	199	199	213	213
SY2108	41-06	213	213	199	199	198	201	151	153	229	235	182	182	199	199	213	213
SY2108	41-07	210	213	187	193	195	207	141	139	238	247	180	182	205	205	213	213
SY2108	41-08	210	210	196	196	204	210	151	155	229	235	180	182	202	208	219	219
SY2108	41-09	210	210	196	196	201	207	133	151	232	235	164	182	199	205	213	221
SY2108	41-10	210	213	193	193	207	207	145	153	220	235	180	182	199	202	213	213
SY2108	41-11	210	213	196	196	192	216	147	147	229	241	180	182	199	202	213	215
SY2108	41-12	210	210	196	196	198	207	147	167	235	247	180	182	199	199	219	219
SY2108	41-13	210	213	190	196	204	219	147	147	217	235	180	182	199	214	213	219
SY2108	41-14	210	213	193	202	198	198	143	143	223	244	180	182	199	199	213	213
SY2108	41-15	210	210	196	202	192	219	143	149	235	235	180	182	199	205	213	213
SY2108	41-16	210	213	193	196	207	207	151	151	235	244	180	182	199	199	213	221
SY2108	41-17	210	213	196	196	201	219	141	143	232	238	176	178	199	199	213	213
SY2108	41-18	210	213	196	196	219	219	147	147	232	235	180	182	199	205	213	213
SY2108	41-19	210	213	196	196	219	219	141	139	226	247	180	182	202	208	213	213
SY2108	41-20	210	213	196	199	204	221	143	143	229	241	180	182	202	211	213	219
SY2108	41-21	210	213	196	196	207	207	143	143	232	235	178	182	199	205	213	213
SY2108	41-22	210	213	193	196	192	201	145	147	232	235	180	182	199	199	213	213
SY2108	41-23	210	210	196	196	201	219	133	151	232	235	180	182	199	205	213	221
SY2108	41-24	210	213	193	196	201	207	147	161	232	235	180	182	199	202	213	213
SY2109	42-01	210	216	193	196	210	213	147	147	229	229	180	182	199	199	213	213
SY2109	42-02	210	210	193	196	207	207	145	149	238	238	180	180	199	205	213	221
SY2109	42-03	210	213	196	196	207	219	141	147	229	256	180	182	199	199	213	213
SY2109	42-04	210	213	196	196	207	213	155	155	232	244	180	182	202	202	213	213
SY2109	42-05	210	213	202	205	207	219	147	153	223	235	180	182	199	199	213	213
SY2109	42-06	210	213	190	196	213	219	147	147	235	235	180	182	199	202	213	213
SY2109	42-07	210	213	196	196	192	204	155	155	235	235	180	182	199	211	213	215
SY2109	42-08	210	213	196	196	207	219	145	157	232	235	176	178	199	199	213	219
SY2109	42-09	210	213	199	199	201	219	147	155	229	235	182	182	199	205	213	223
SY2109	42-10	210	213	196	196	207	219	155	155	238	238	174	174	202	208	213	213
SY2109	42-11	210	213	193	196	192	192	143	155	235	241	180	182	199	211	213	219
SY2109	42-12	210	213	196	199	219	219	155	155	229	229	180	180	208	208	213	213
SY2109	42-13	210	213	196	196	207	213	147	149	226	244	180	182	199	199	213	223
SY2109	42-14	210	213	190	196	207	213	151	153	232	232	180	182	199	202	215	221
SY2109	42-15	210	213	196	196	192	192	143	147	235	238	182	182	199	211	213	223
SY2109	42-16	210	213	196	199	207	210	143	165	232	253	180	182	199	199	213	215
SY2109	42-17	210	213	196	196	219	219	145	147	232	232	180	182	199	199	213	223
SY2109	42-18	210	213	196	199	219	219	147	151	232	238	182	182	199	208	213	215
SY2109	42-19	210	210	196	196	216	219	145	145	223	235	182	182	199	199	213	221
SY2109	42-20	210	213	196	196	207	207	149	159	229	229	180	182	199	211	213	213
SY2109	42-21	210	213	193	196	201	207	149	149	229	232	174	174	205	208	213	213
SY2109	42-22	210	210	190	196	201	213	149	149	229	232	180	182	202	202	213	221
SY2109	42-23	210	213	196	196	204	221	143	143	232	253	178	182	199	202	213	213
SY2109	42-24	210	213	196	196	210	221	151	151	223	226	180	182	199	199	213	213
SY2110	43-01	210	213	199	199	213	219	147	149	232	235	174	182	205	208	213	221
SY2110	43-02	210	213	193	196	207	219	149	151	235	235	180	182	208	208	213	213
SY2110	43-03	210	213	196	196	207	207	155	155	226	232	180	182	199	208	213	213
SY2110	43-04	207	210	193	196	207	221	149	149	229	232	180	182	199	199	213	219
SY2110	43-05	210	210	196	199	201	219	147	149	232	235	174	178	199	208	213	221
SY2110	43-06	210	213	190	196	210	216	145	147	232	244	180	182	199	208	213	213
SY2110	43-07	210	210	193	196	195	210	147	147	217	241	182	182	199	211	213	219
SY2110	43-08	210	213	199	199	219	219	149	149	226	238	182	182	199	202	213	213
SY2110	43-09	210	213	190	196	213	219	155	155	226	235	182	182	205	211	213	221
SY2110	43-10	210	213	196	196	219	221	147	155	232	235	180	182	199	199	213	213
SY2110	43-11	210	213	190	196	192	216	147	155	235	235	182	184	199	208	213	213
SY2110	43-12	210	213	196	196	204	219	147	149	238	241	180	182	199	208	215	215
SY2110	43-13	210	210	193	196	219	219	147	149	232	238	180	182	199	199	213	213
SY2110	43-14	210	213	190	196	198	207	131	147	232	232	182	182	205	208	213	223
SY2110	43-15	210	213	196	196	198	207	145	145	235	235	180	182	205	208	213	213
SY2110	43-16	210	213	193	196	201	201	141	139	229	244	180	182	199	208	213	213
SY2110	43-17	210	210	193	196	201	213	147	157	229	232	180	180	199	205	213	221
SY2110	43-18	210	213	190	196	207	219	143	147	229	235	180	182	199	208	213	213
SY2110	43-19	210	213	199	199	210	219	143	147	232	241	180	182	199	208	213	223
SY2110	43-20	210	213	196	196	198	210	149	151	235	247	180	182	199	211	213	213
SY2110	43-21	210	213	196	199	207	207	143	145	238	238	182	182	199	205	213	223
SY2110	43-22	210	213	196	196	201	216	145	167	238	256	180	182	208	208	213	223
SY2110	43-23	210	213	199	199	213	213	143	143	238	244	180	192	199	199	213	221
SY2110	43-24	210	210	199	199	216	216	145	149	229	235	182	182	199	205	213	213
SY2111	44-01	210	213	193	199	201	207	145	147	226	241	182	182	199	199	213	223
SY2111	44-02	210	213	199	199	213	213	145	147	223	235	182	182	199	199	213	215
SY2111	44-03	210	213	190	196	207	216	155	155	238	241	180	182	199	199	213	213
SY2111	44-04	210	213	199	199	207	210	145	145	226	226	180	182	205	208	213	221
SY2111	44-05	210	210	196	199	204	210	149	157	235	238	184	184	199	199	213	213
SY2111	44-06	210	213	196	199	219	219	143	173	238	238	182	182	199	199	213	213
SY2111	44-07	210	213	199	199	210	210	145	145	226	229	178	178	199	199	213	213
SY2111	44-08	210	213	190	196	198	198	145	145	220	229	182	182	199	199	213	213
SY2111	44-09	210	216	199	199	198	216	145	145	232	235	182	182	202	205	213	221
SY2206	45-01	210	213	193	196	210	219	153	175	229	232	184	184	199	199	213	217
SY2206	45-02	210	213	196	196	192	213	149	149	232	232	180	182	205	211	215	217
SY2207	46-01	210	210	193	196	216	219	151	161	223	226	180	182	199	199	203	213
SY2207	46-02	210	213	193	193	210	219	149	165	235	244	180	182	199	214	213	215
SY2207	46-03	210	213	196	196	195	198	147	149	229	229	180	182	205	214	213	213
SY2207	46-04	210	213	196	199	207	213	149	151	232	235	180	182	199	205	213	213
SY2207	46-05	0	0	193	193	0	0	147	151	232	235	182	182	199	214	0	0
SY2207	46-06	210	213	193	196	207	207	145	145	232	244	180	182	199	205	213	221
SY2207	46-07	210	213	193	199	207	213	149	151	223	235	180	182	199	208	213	221
SY2207	46-08	210	213	196	196	192	219	147	155	226	235	178	182	199	199	213	213
SY2207	46-09	210	213	193	193	207	207	145	159	232	235	180	180	208	208	0	0
SY2207	46-10	0	0	193	193	0	0	145	145	235	238	0	0	199	199	0	0
SY2207	46-11	210	210	196	196	198	207	155	155	229	235	180	182	199	199	215	215
SY2207	46-12	0	0	193	193	0	0	147	151	226	235	180	180	0	0	0	0
SY2207	46-13	210	219	196	199	201	219	147	149	226	229	180	182	199	199	213	213
SY2207	46-14	207	210	196	199	213	221	145	147	241	244	184	184	199	202	213	215
SY2207	46-15	210	213	190	196	207	207	147	153	232	244	180	182	199	199	213	213
SY2207	46-16	210	213	193	196	213	216	163	165	232	238	180	182	199	199	221	221
SY2207	46-17	210	213	196	196	204	204	145	161	223	223	178	178	199	202	213	213
SY2207	46-18	210	213	190	196	207	219	141	147	232	238	180	182	199	199	0	0
SY2207	46-19	210	213	196	196	192	204	141	139	232	232	182	182	199	199	213	213
SY2207	46-20	210	210	193	193	216	219	149	151	226	235	182	182	199	205	0	0
SY2207	46-21	210	213	196	196	201	221	145	145	229	235	180	182	199	205	213	215
SY2207	46-22	210	213	190	196	207	216	147	147	226	247	180	182	199	199	203	213
SY2207	46-23	210	210	196	196	192	210	143	143	229	232	180	182	199	211	213	213
SY2207	46-24	210	210	196	199	216	219	153	155	229	235	180	182	199	199	213	213
SY2208	47-01	0	0	0	0	0	0	0	0	0	0	0	0	0	0	0	0
SY2208	47-02	210	213	196	196	210	219	145	147	244	244	182	182	202	202	213	213
SY2208	47-03	210	213	193	199	219	219	147	151	232	235	180	182	199	205	213	219
SY2208	47-04	210	213	193	196	210	216	139	139	223	241	180	182	199	205	213	221
SY2208	47-05	210	210	196	196	201	207	149	167	220	235	180	182	199	220	213	225
SY2208	47-06	210	213	193	193	201	207	147	151	232	235	182	182	199	202	205	205
SY2208	47-07	210	213	193	199	213	219	145	145	223	223	180	182	199	199	213	215
SY2208	47-08	207	210	196	196	207	219	143	147	238	247	182	182	199	208	213	213
SY2208	47-09	210	210	193	196	201	201	145	147	220	241	180	182	202	208	213	213
SY2208	47-10	210	213	196	196	201	201	141	149	226	235	180	182	199	202	213	213
SY2208	47-11	210	213	196	196	201	207	145	147	232	235	182	184	199	205	213	213
SY2208	47-12	210	213	196	196	201	219	141	145	232	244	182	182	199	214	213	223
SY2208	47-13	210	213	196	196	219	221	145	147	238	247	178	182	199	199	213	221
SY2208	47-14	210	213	193	196	201	224	147	147	223	232	180	182	199	199	213	213
SY2208	47-15	210	213	196	196	219	221	147	157	229	256	180	182	199	199	213	213
SY2208	47-16	210	213	196	199	207	210	141	147	235	235	180	182	199	205	213	215
SY2208	47-17	210	213	196	196	207	216	145	149	226	232	182	182	199	208	221	221
SY2208	47-18	210	213	193	193	207	207	147	151	217	232	180	182	199	214	0	0
SY2208	47-19	210	213	196	196	210	219	143	151	235	244	180	182	202	202	213	213
SY2208	47-20	210	210	196	196	201	219	141	145	232	232	180	182	202	208	213	213
SY2208	47-21	210	219	196	196	192	207	147	147	232	235	180	182	199	208	213	221
SY2208	47-22	210	216	196	205	201	207	147	151	235	244	182	184	202	202	213	213
SY2208	47-23	210	213	193	196	183	183	147	149	220	256	180	182	196	199	213	213
SY2208	47-24	210	213	196	196	219	219	143	153	226	226	178	182	199	205	213	213
SY2209	48-01	210	213	199	199	219	221	157	159	223	244	180	182	208	208	213	213
SY2209	48-02	204	210	193	196	210	216	149	149	232	235	180	182	199	208	213	213
SY2209	48-03	210	213	196	196	207	213	155	161	223	256	178	178	205	214	213	213
SY2209	48-04	210	213	199	199	207	221	145	145	235	238	182	182	199	199	213	213
SY2209	48-05	210	213	196	196	201	201	149	155	229	247	180	182	199	202	213	213
SY2209	48-06	210	213	199	199	216	227	145	147	235	244	182	182	199	217	213	225
SY2209	48-07	210	213	199	199	201	210	145	153	235	253	178	178	199	205	213	221
SY2209	48-08	210	213	199	199	201	221	153	153	229	235	180	182	199	205	213	213
SY2209	48-09	210	213	193	199	213	219	145	161	226	229	180	182	199	211	213	213
SY2209	48-10	210	210	196	196	204	204	145	147	232	235	180	182	202	205	213	213
SY2209	48-11	210	213	196	196	207	207	147	151	232	238	180	182	199	202	213	217
SY2209	48-12	210	213	196	196	204	207	155	165	229	235	180	182	199	205	213	213
SY2209	48-13	210	213	196	199	201	216	147	161	220	238	174	182	199	202	213	213
SY2209	48-14	210	213	190	196	219	219	145	163	235	235	180	182	199	199	213	215
SY2209	48-15	210	213	193	196	210	219	147	147	226	238	180	182	199	205	211	213
SY2209	48-16	210	210	196	196	201	210	145	145	235	238	178	180	199	199	213	221
SY2209	48-17	210	213	190	196	213	213	147	147	232	238	180	182	199	199	213	213
SY2209	48-18	210	213	196	196	195	219	145	147	217	232	182	182	199	199	213	213
SY2209	48-19	210	213	193	196	201	219	159	159	232	238	180	182	196	202	213	221
SY2209	48-20	204	210	190	199	207	216	149	149	235	253	182	182	199	199	213	215
SY2209	48-21	210	213	196	196	201	219	145	149	229	238	180	182	199	208	219	219
SY2209	48-22	210	213	193	196	213	219	147	149	232	235	180	182	199	199	213	213
SY2209	48-23	210	213	193	196	210	224	141	147	226	232	180	182	202	211	217	219
SY2209	48-24	210	213	193	196	201	219	147	149	244	247	180	182	199	199	213	213
SY2210	49-01	210	213	196	199	210	219	147	147	232	241	180	182	196	199	213	213
SY2210	49-02	210	213	196	196	219	219	147	149	223	244	180	182	199	208	213	237
SY2210	49-03	210	213	193	196	207	219	145	155	223	244	180	182	199	199	213	213
SY2210	49-04	210	213	196	196	213	219	141	147	229	235	180	182	199	199	213	213
SY2210	49-05	210	210	196	196	210	210	147	149	235	235	182	192	205	214	213	213
SY2210	49-06	210	213	193	196	198	207	145	145	229	244	182	198	208	211	219	219
SY2210	49-07	210	213	196	196	213	213	147	151	232	235	180	182	199	199	213	221
SY2210	49-08	210	213	196	196	198	198	141	147	226	229	180	182	199	202	213	213
SY2210	49-09	210	213	193	196	207	219	149	149	244	244	180	182	199	199	213	221
SY2210	49-10	210	213	199	199	201	219	147	155	229	238	180	182	199	202	213	213
SY2210	49-11	207	210	196	196	207	213	143	149	226	229	180	182	199	205	213	213
SY2210	49-12	204	213	196	196	204	210	147	157	226	229	180	182	199	199	213	219
SY2210	49-13	210	213	196	196	204	216	131	145	229	235	180	182	199	199	213	221
SY2210	49-14	210	213	196	199	219	221	149	149	217	241	180	182	205	205	213	213
SY2210	49-15	210	213	196	196	207	207	145	149	232	235	180	182	199	199	213	213
SY2210	49-16	210	213	193	196	204	216	147	147	226	229	180	182	199	199	219	219
SY2210	49-17	210	216	196	196	210	219	141	145	232	241	180	182	199	199	213	221
SY2210	49-18	210	213	196	199	207	213	141	147	229	256	180	182	199	202	213	213
SY2210	49-19	207	210	196	199	207	219	145	145	226	238	184	184	199	217	213	221
SY2210	49-20	210	213	196	199	219	219	145	145	229	235	180	182	202	202	213	213
SY2210	49-21	210	213	190	196	219	221	147	147	232	244	180	182	205	208	213	213
SY2210	49-22	210	213	196	196	204	213	145	145	235	238	180	180	199	199	213	213
SY2210	49-23	210	213	193	196	192	219	147	151	235	241	180	182	199	205	213	221
SY2210	49-24	210	210	193	196	207	216	149	149	232	235	180	182	199	208	213	213
SY2211	50-01	210	213	190	196	186	210	147	147	235	247	180	182	199	199	207	213
SY2211	50-02	210	213	193	196	204	219	145	149	229	244	180	182	202	205	213	213
SY2211	50-03	210	213	193	199	219	219	149	151	229	244	182	182	199	199	213	213
SY2211	50-04	210	213	196	199	192	192	143	155	229	232	180	182	199	199	213	213
SY2211	50-05	207	210	193	202	210	224	147	147	220	223	180	182	199	208	213	221
SY2211	50-06	210	216	196	196	204	207	147	153	229	232	182	182	205	208	213	213
SY2211	50-07	210	210	196	196	207	207	143	163	220	223	182	182	199	199	213	223
SY2211	50-08	210	210	199	199	201	213	155	155	232	244	182	182	199	205	213	213
SY2211	50-09	210	213	190	196	201	221	147	147	232	235	180	182	199	208	213	213
SY2211	50-10	210	210	199	199	207	210	147	151	232	241	180	182	199	199	213	213
“0” represents a null value.
